# 1 Chromatin regulates genome-wide transcription factor binding affinities

2 **Hannah K. Neikes<sup>1\*</sup>, Rik G.H. Lindeboom<sup>2\*\*</sup>, Cathrin Gräwe<sup>1</sup>, Lieke A. Lamers<sup>1</sup>, Marijke P. Baltissen<sup>1</sup>,**  
3 **Pascal W.T.C. Jansen<sup>1</sup>, Simon J. van Heeringen<sup>3</sup>, Colin Logie<sup>4</sup>, Sarah A. Teichmann<sup>2</sup>, Michiel**  
4 **Vermeulen<sup>1#</sup>**

5 \* These authors contributed equally

6 # Co-corresponding authors

7 1. Department of Molecular Biology, Faculty of Science, Radboud Institute for Molecular Life Sciences, Oncode  
8 Institute, Radboud University Nijmegen, 6525 GA Nijmegen, The Netherlands.

9 2. Wellcome Sanger Institute, Wellcome Genome Campus, Hinxton, Cambridge, UK.

10 3. Department of Molecular Developmental Biology, Faculty of Science, Radboud Institute for Molecular Life  
11 Sciences, Radboud University Nijmegen, 6525 GA Nijmegen, The Netherlands.

12 4. Department of Molecular Biology, Faculty of Science, Radboud Institute for Molecular Life Sciences,  
13 Radboud University Nijmegen, 6525 GA Nijmegen, The Netherlands.

## 14 Abstract

15 Transcription factor binding across the genome is regulated by DNA sequence and chromatin features.  
16 However, it is not yet possible to quantify the impact of chromatin context on genome-wide  
17 transcription factor binding affinities. Here we report the establishment of a method to determine  
18 genome-wide absolute apparent binding affinities of transcription factors to native, chromatinized  
19 DNA. Our experiments revealed that DNA accessibility is the main determinant of transcription factor  
20 binding in the genome, which largely restricts nanomolar affinity binding of YY1, SP1 and MYC/MAX  
21 to promoters, while FOXA1 also interacts with non-promoter elements with high affinity.  
22 Furthermore, whereas consensus DNA binding motifs for transcription factors are important to  
23 establish very high-affinity binding sites, these motifs are not always strictly required to generate  
24 nanomolar affinity interactions in the genome. Finally, we uncovered transcription factor  
25 concentration dependent binding to specific gene classes, suggesting transcription factor  
26 concentration dependent effects on gene expression and cell fate. Importantly, our method adds a  
27 quantitative dimension to transcription factor biology which enables stratification of genomic targets  
28 based on transcription factor concentration and prediction of transcription factor binding sites under  
29 non-physiological conditions, such as disease associated overexpression of (onco)genes.

## 30 Introduction

31 Gene expression is regulated by a complex interplay between DNA sequence, chromatin structure and  
32 transcription factor binding<sup>1-3</sup>. A plethora of methods to characterize cellular epigenomes have been  
33 developed in recent years<sup>4-6</sup>. Furthermore, various methods to determine how transcription factors  
34 recognize DNA sequence motifs have been described<sup>7,8</sup>. DNA sequence, chromatin context, co-factors  
35 and DNA compaction are thought to have an important regulatory role on transcription factor binding  
36 and gene regulation<sup>9,10</sup>, while it is proposed that binding of different transcription factors is not all  
37 regulated in the same way<sup>11</sup>. Importantly, genome chromatinization is predicted to regulate up to 98%  
38 of all transcription factor binding events in human cells<sup>12</sup> and is, in addition to DNA sequence, the  
39 largest determinant of transcription factor binding<sup>13</sup>.

40 Observing where proteins bind in the genome does not explain *when* they bind certain loci. To  
41 biochemically understand transcription factor binding, the binding specificity and the affinity of a  
42 transcription factor<sup>14</sup> for each DNA sequence must be determined. Binding specificity helps to predict  
43 which genomic sites are potential transcription factor binding sites, while the affinity determines for  
44 each genomic site at what transcription factor concentration it will be bound. In recent years, several  
45 *in vitro* techniques have been developed to determine global protein-DNA interaction specificities<sup>8</sup>,  
46 affinities<sup>15</sup>, or a combination of both<sup>16</sup>. Furthermore, many algorithms have been developed to predict  
47 transcription factor binding *in silico*, based on DNA accessibility, DNA sequence or gene expression  
48 data<sup>17</sup>. However, no existing technique is capable of quantifying absolute transcription factor binding  
49 affinities in the chromatinized genome (reviewed in<sup>18</sup>).

50 Here we present a method to determine Binding Affinities to Native Chromatin by sequencing (BANC-  
51 seq), in which native chromatinized DNA is used to determine genome-wide absolute transcription  
52 factor binding affinities. To this end, transcription factor concentration dependent binding to  
53 regulatory elements is quantified by either ChIP-seq or CUT&RUN<sup>5</sup> to determine genome-wide binding  
54 affinities in a native chromatin context. BANC-seq enabled quantification of thousands of nanomolar  
55 apparent binding affinities for multiple transcription factors in multiple cell types, thereby allowing us  
56 to investigate the role of chromatin context and DNA sequence in regulating absolute genome-wide  
57 transcription factor binding affinities. BANC-seq adds a quantitative dimension to transcription factor  
58 biology, which confirms that chromatin context is the major determinant of transcription factor  
59 binding affinity<sup>13</sup>. Our data reveal that pre-existing, permissive chromatin architecture is a pre-  
60 requisite for high and low affinity transcription factor binding to occur. In addition, our results indicate  
61 that, by and large, the presence or absence of canonical transcription factor binding motifs  
62 differentiate high and low affinity transcription factor binding sites, respectively. Importantly, we  
63 show that chromatin context is interpreted differently by the pioneering transcription factor FOXA1  
64 compared to YY1, SP1 and MYC. Finally, our data reveal that specific gene classes are bound at  
65 different transcription factor concentrations, suggesting concentration dependent effects on  
66 transcription and cell fate. These findings underscore the importance of incorporating binding  
67 affinities when investigating gene regulatory networks, and we therefore anticipate that BANC-seq  
68 will be an important tool for the gene expression, chromatin and quantitative systems biology  
69 community.

## 70 **Results**

71 To determine genome-wide transcription factor-DNA binding affinities while retaining *in vivo*  
72 chromatin context, we established the BANC-seq workflow, in which intact chromatin is incubated  
73 with a titration-series of a purified epitope-tagged transcription factor (**Fig. 1a**). Next, the genomic  
74 binding sites at each transcription factor concentration are determined by either ChIP-seq or  
75 CUT&RUN, using an antibody against the tag-epitope. The nuclear isolation procedure is based on  
76 protocols for genome-wide DNA accessibility profiling, a well-established technique known to retain  
77 *in vivo* nucleosome positioning and transcription factor binding<sup>4</sup>. To investigate whether the BANC-  
78 seq workflow results in a loss of chromatin and co-factors for transcription factor binding, we used  
79 mass spectrometry to quantify the proteome before and after nuclear isolation. Importantly, while  
80 cytoplasmic proteins were lost, we observed no decrease in the abundance of nuclear transcription  
81 factors after nuclear isolation (**Extended Data Fig. 1a**).

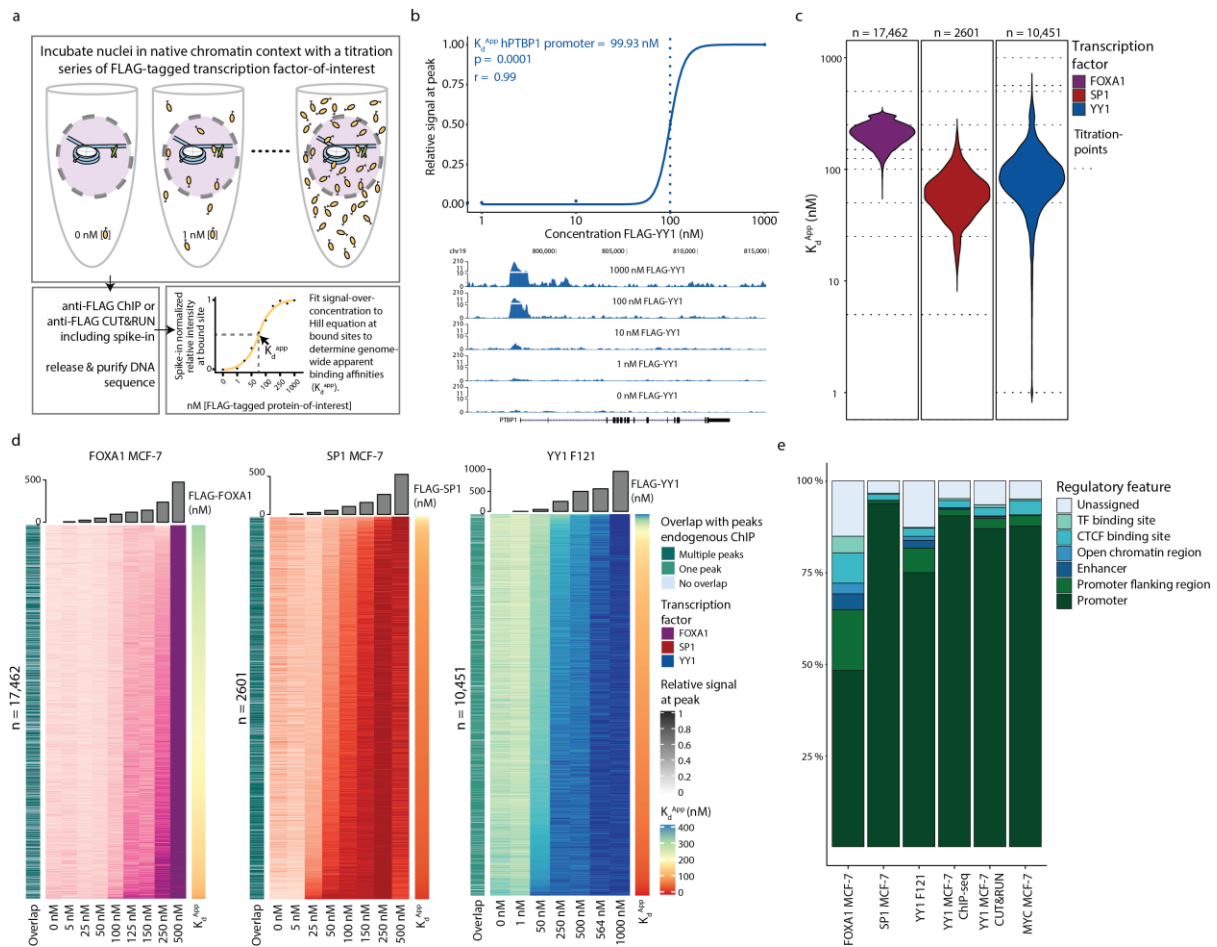

82

**Figure 1 | BANC-seq enables determination of genome-wide apparent binding affinities to native chromatin.** (a)

Overview of the experimental procedure. Isolated nuclei are incubated with a titration series of purified FLAG-tagged transcription factor, after which binding is quantified by anti-FLAG ChIP-seq or CUT&RUN, both including heterologous spike-in DNA. Spike-in normalised sequencing reads at each binding site and transcription factor-titration point are fitted to a Hill-curve to determine apparent binding affinities ( $K_d^{APP}$ ). (b) Spike-in normalised sequencing reads per titration point of FLAG-YY1 at the human PTBP1 promoter, relative to the highest signal (top; dotted line indicating the  $K_d^{APP}$ ), and visualized in the genome browser (bottom). (c) Distribution of  $K_d^{APP}$ s of FOXA1 in MCF-7, SP1 in MCF-7 and YY1 in mESC cells F121. Dotted lines indicate the tested transcription factor concentrations per experiment. (d) Heatmap representing spike-in normalised sequencing reads relative to the highest signal for the same experiments as in (c). Each row represents one transcription factor binding site. The overlap of each binding site with peaks from endogenous ChIP-seq experiments of the same transcription factor is shown on the left of each heatmap, while  $K_d^{APP}$ s are shown in the right column. (e) Overlap of identified binding sites with known regulatory features in the Ensembl Regulatory Build for different BANC-seq experiments.

83 Next, we set out to benchmark BANC-seq by adding 1, 10, 100 and 1000 nM FLAG-tagged YY1 to freshly  
 84 isolated nuclei, followed by nuclear permeabilization, ten-minute incubation at 37°C and crosslinking.  
 85 YY1 is a zinc finger transcription factor that binds enhancers and promoters to regulate gene  
 86 expression and enhancer-promoter interactions<sup>19</sup>. Given the fact that the core sequence motif for  
 87 specific YY1 binding is short, the amount of theoretical binding sites in the human genome is several  
 88 orders-of-magnitude larger than actual binding sites observed by ChIP-seq. Therefore, we expected  
 89 genome-wide YY1 binding affinities to be highly dependent on chromatin context. Sequencing  
 90 revealed increased binding of YY1 at a known YY1 binding site with increasing transcription factor  
 91 concentration (Fig. 1b; qPCR validation in Extended Data Fig. 1b). To quantify binding affinities, we  
 92 used spike-in normalized ChIP-seq signal at the tested transcription factor concentrations to infer the  
 93 apparent dissociation constant ( $K_d^{APP}$ ) at each identified binding site. To this end, we fitted parameters

94 of a Hill-like curve to the observed signal over known transcription factor concentration (**Fig. 1a**; see  
95 *Methods*) and were able to determine high confidence apparent binding site affinities ranging from  
96 36 to 156 nM for 5,372 genomic loci. Previously reported *in vitro* binding assays to determine affinities  
97 between YY1 and DNA have reported  $K_d$  values ranging from 3 to 4000 nM<sup>20-24</sup>, although most  $K_{ds}$  were  
98 found to be in the order of 100 nM, which is in good agreement with our measurements, providing a  
99 benchmark to profile additional transcription factors.

100 Encouraged by this pilot experiment, we performed BANC-seq with the pioneering transcription factor  
101 FOXA1, and transcription factors YY1 and SP1, and transcription factor heterodimer MYC/MAX in  
102 human breast cancer cells (MCF-7) and mouse embryonic stem cells. As ChIP-seq requires large  
103 amounts of cells as input material, we also adapted the protocol to be compatible with CUT&RUN to  
104 reduce the required number of input cells. These experiments revealed between 2,601 and 17,462  
105 quantified binding affinities for per experiment (with a total of 48,220 quantified sites across the  
106 human and mouse genome), which span the entire nanomolar affinity range, equating to transcription  
107 factor expression of 100 to up to 100,000 molecules per nucleus (depending on the nuclear volume,  
108 see *Discussion*, **Fig. 1c-d**). The range of observed  $K_d^{AppS}$  appeared to be dependent on the transcription  
109 factors we studied as well as and cell type (**Fig. 1c**, **Extended Data Fig. 2a-b**). However, using different  
110 methods (ChIP-seq and CUT&RUN) did not drastically influence the measured  $K_d^{AppS}$ , as one would  
111 expect (**Extended Data Fig. 2a**). Reassuringly, 83.6±7.6 % (mean ± SD) of the identified binding sites of  
112 exogenously added FLAG-tagged transcription factors overlapped with binding sites previously  
113 identified by endogenous ChIP-seq experiments for the tested transcription factors in the respective  
114 organism (**Fig. 1d**, **Extended Data Fig. 2b**), and 92.1±4.8% (mean ± SD) of the binding sites overlapped  
115 with annotated regulatory elements (**Fig. 1e**). This indicates that the exogenously added FLAG-tagged  
116 transcription factors exhibit physiological genomic binding in BANC-seq experiments, enabling faithful  
117 determination of genome-wide binding kinetics to regulatory elements by BANC-seq.

## 118 **Chromatin context impacts binding affinities**

119 Next, we investigated the relationship between transcription factor binding affinities and chromatin  
120 context. We observed that almost all genomic sites for which we could determine high confidence  
121 transcription factor binding affinities are enriched for active histone marks, while being devoid of  
122 repressive and heterochromatin marks (**Fig. 2a**), illustrating that accessible chromatin is a prerequisite  
123 for transcription factor binding to occur. Nanomolar binding of SP1, YY1 and MYC/MAX appears to be  
124 almost exclusively restricted to promoter regions (**Fig. 1e**, mean ± SD = 86,7±0.71; and illustrated by  
125 the close proximity of peaks to transcription start sites depicted in **Extended Data Fig. 2c**). Strikingly,  
126 high affinity binding of these transcription factors is not often observed at enhancers, suggesting that  
127 chromatin is organized in such a way to facilitate binding of these transcription factors at promoters

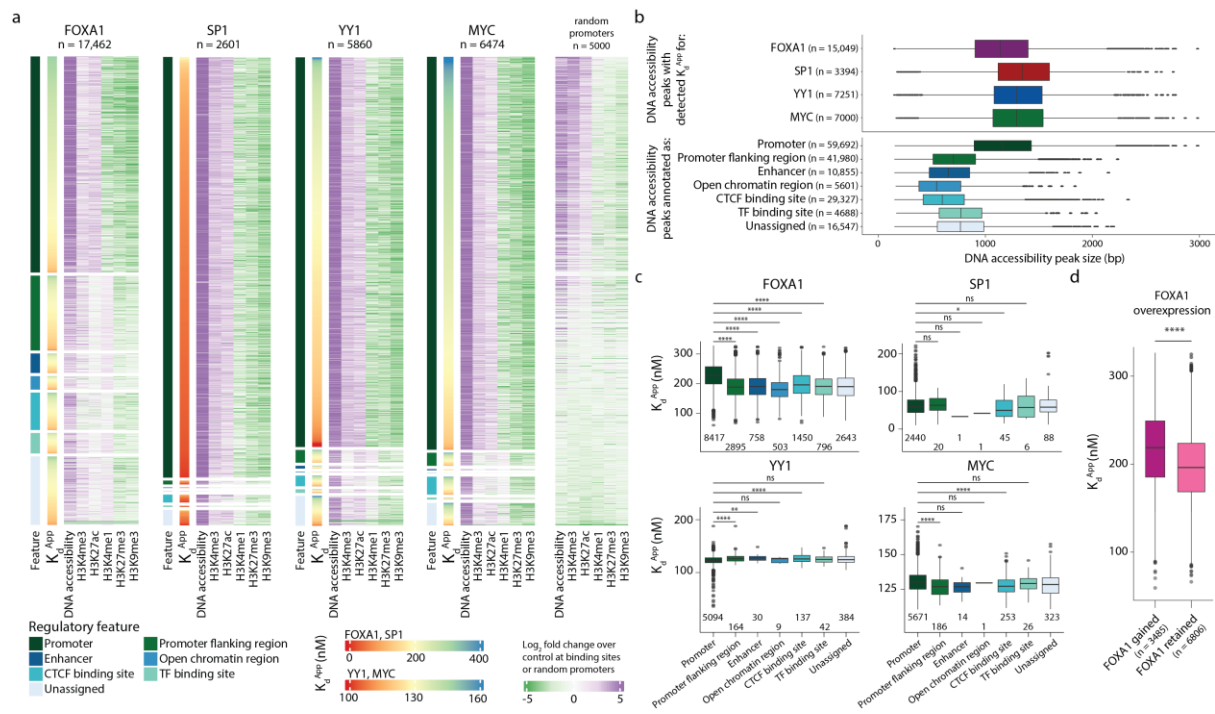

128

**Figure 2 | Chromatin context regulates transcription factor binding affinities.** (a) Heatmap showing matched epigenome dynamics at binding sites with high-confidence  $K_d^{App}$ s fitted for FOXA1, SP1, YY1 and MYC in MCF-7, or 5,000 random promoters. Signals of ChIP-seq and DNA accessibility (by ATAC-seq) tracks for MCF-7 are shown as  $\log_2$  fold change over the mean signal in five matched control tracks. Sites are ranked by assigned regulatory feature (first column per heatmap) and apparent binding affinity (second column heatmap). (b) Boxplots showing the size of DNA accessibility peaks at sites with high-confidence  $K_d^{App}$ s fitted per transcription factor (top), or per assigned regulatory feature (bottom). (c) Boxplots showing  $K_d^{App}$ s per assigned regulatory feature for the same transcription factors as in (a). Numbers at the bottom of each plot represent the number of sites in each group. (d) Boxplots showing  $K_d^{App}$ s for FOXA1 at sites that gain or retain FOXA1 binding after FOXA1 overexpression in MCF-7. \* are used to indicate significance according to a two-sided Wilcoxon test (ns:  $p > 0.05$ , \*:  $p \leq 0.05$ , \*\*:  $p \leq 0.01$ , \*\*\*\*:  $p \leq 0.0001$ ). Box plots were drawn with the center line as the median, the hinges as the first and third quartiles, and with the whiskers extending to the lowest and highest values that were within  $1.5 \times$  interquartile range.

129 at low concentrations. Interestingly, low affinity binding sites for SP1, YY1 and MYC/MAX overlap more  
 130 frequently compared to high affinity binding sites, suggesting that low affinity binding is largely  
 131 controlled by DNA accessibility (**Extended Data Fig. 2d**). In contrast, nanomolar binding affinities for  
 132 FOXA1 are not restricted to promoters (**Fig. 2a**): more than half of its quantified binding affinities are  
 133 detected outside promoter regions, and identified binding sites are more distal to transcription start  
 134 sites compared to those for the other tested transcription factors (**Extended Data Fig. 2c**). This  
 135 observation may be explained by the fact that the pioneering factor capabilities of FOXA1<sup>11,25</sup> make it  
 136 less dependent on pre-existing chromatin architecture and DNA accessibility.

137 To further investigate the correlation between DNA accessibility and high affinity transcription factor  
 138 binding, we investigated whether promoters are more accessible in general compared to enhancer  
 139 regions. Indeed, we observed that hyper-accessible regions in promoters are nearly twice as large  
 140 compared to other types of regulatory elements (**Fig. 2b**), indicating that SP1, YY1 and MYC  
 141 preferentially interact with larger accessible DNA elements. In contrast, FOXA1 bound sites are  
 142 generally characterized by narrower and reduced accessibility (**Fig. 2b, Extended Data Fig. 3a**),  
 143 possibly reflecting its ability to open condensed chromatin<sup>26</sup>. Here, FOXA1 was able to bind both  
 144 promoters and enhancers with reduced accessibility, in particular at high affinity binding sites

145 **(Extended Data Fig. 3a)**, indicating that regulation of FOXA1 binding in the genome is fundamentally  
146 different compared to binding of SP1, YY1 and MYC.

147 In agreement with the enhancer binding function of FOXA1<sup>27,28</sup>, we found that almost half of its binding  
148 sites are characterized by high levels of the active enhancer mark H3K4me1, while the majority of  
149 binding sites of all other transcription factors did not overlap with this histone modification (**Fig. 2a**,  
150 **Extended Data Fig. 3a**). Interestingly, high affinity FOXA1 sites were remarkably less accessible  
151 compared to low affinity sites (**Extended Data Fig. 3a**), which is in agreement with the ability of this  
152 transcription factor to bind and subsequently open compacted chromatin, rendering it accessible to  
153 other transcription factors<sup>25,26</sup>. The fact that binding affinities of FOXA1 showed a strong correlation  
154 with H3K4me1 (**Extended Data Fig. 3 a-c**), indicates that this epigenetic mark is permissive for FOXA1  
155 binding. In contrast, levels of DNA accessibility and H3K4me3 were relatively stable (and higher than  
156 for FOXA1) at binding sites of the other transcription factors over the complete range of  $K_d^{AppS}$ ,  
157 indicating that these require hyper-accessible sites for binding to occur, regardless of transcription  
158 factor concentration.

159 Finally, we observed that FOXA1 binding at promoters is characterized by significantly lower affinities  
160 (higher numerical  $K_d^{AppS}$ ) compared to binding at other regulatory elements (**Fig. 2c**). This indicates  
161 that these sites are only bound at very high FOXA1 concentrations. To validate this finding, we  
162 intersected our genome-wide FOXA1 binding affinities with previously identified<sup>28</sup> sites that gain  
163 FOXA1 binding upon FOXA1 overexpression, and found that FOXA1-gained sites displayed significantly  
164 lower affinity compared to retained sites (**Fig. 2d**). In addition, sites that gain FOXA1 binding primarily  
165 consisted of promoters (75 %), while only 25 % of sites that retained pre-existing FOXA1 binding  
166 mapped to promoters (**Extended Data Fig. 4b**) and displayed higher DNA accessibility and H3K4me3  
167 levels, but lower H3K4me1 levels (**Extended Data Fig. 4c-e**). These results demonstrate that chromatin  
168 context greatly influences binding affinities of transcription factors to DNA, thereby emphasizing the  
169 added value of investigating transcription factor binding affinities in a native chromatin context  
170 compared to naked DNA. Furthermore, for the transcription factor FOXA1, we observed an anti-  
171 correlation between binding affinities and DNA accessibility, which is the opposite from what we  
172 observed for SP1, YY1 and MYC/MAX, thus providing evidence for fundamentally different molecular  
173 interactions with the genome by different transcription factors.

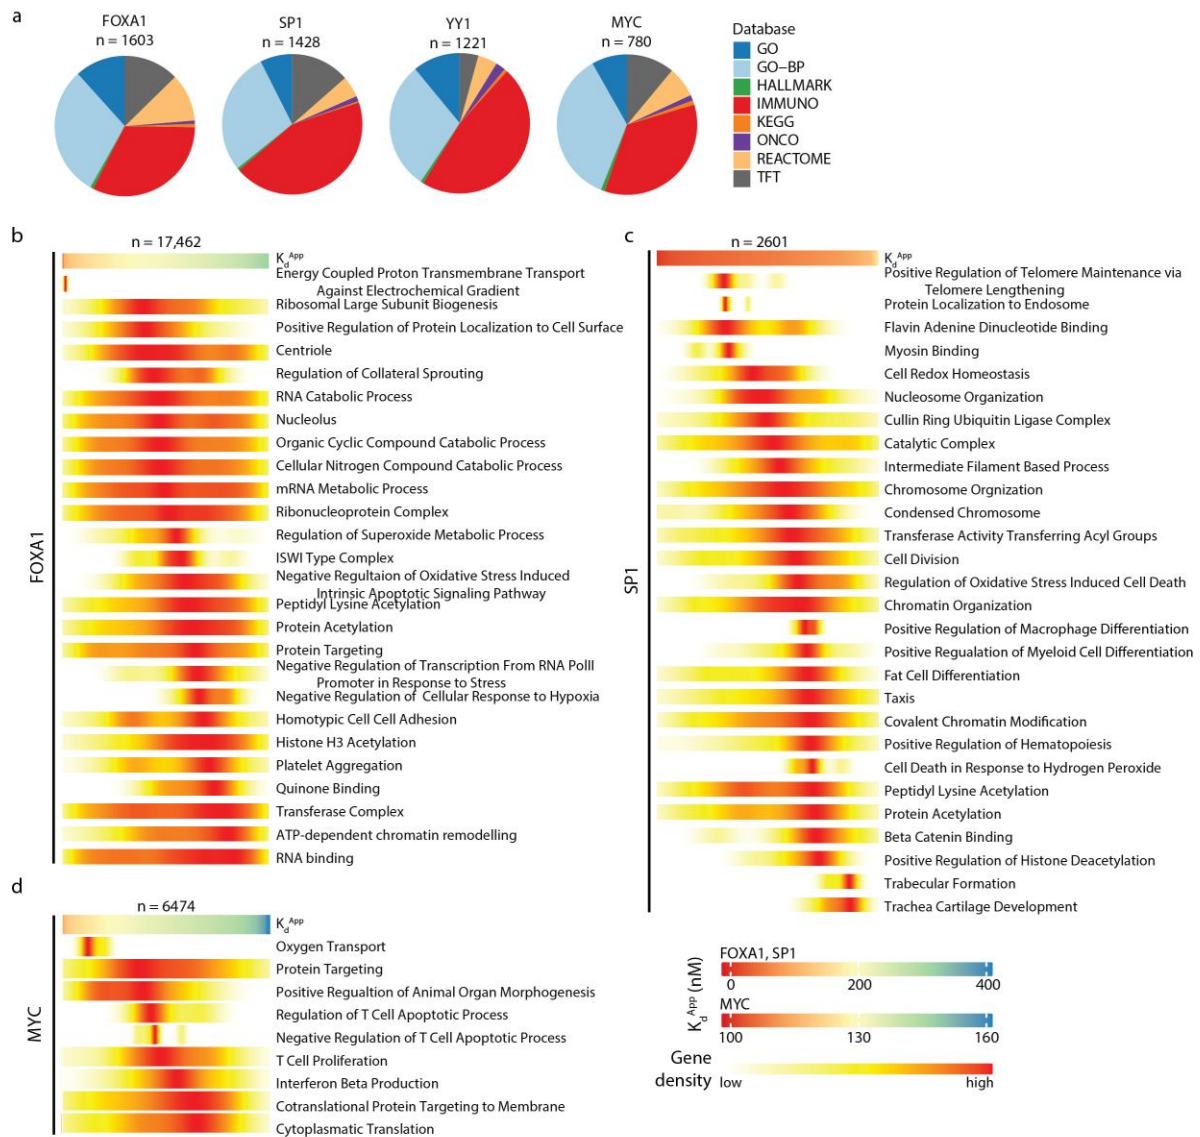

**Figure 3 | Concentration dependent binding of transcription factor target genes.** (a) Pie charts representing the proportions of significantly enriched gene sets (FDR<0.05) per Molecular Signatures Database collection for the different transcription factors. (b-d) Heatmaps representing enrichment of genes from various gene sets over the range of  $K_d^{App}$ s for SP1, FOXA1 and MYC/MAX complex in MCF-7. Sites are ranked by  $K_d^{App}$ s (top heatmap per experiment) and gaussian kernel density estimates of the density of highly significant gene sets (FDR<0.001) over the ranked  $K_d^{App}$ s values are visualized to show that some gene sets are enriched at certain transcription factor concentrations.

## 174 Concentration dependent target binding

175 Inspired by the observed dynamic binding of genomic targets at different transcription factor  
 176 concentrations, we investigated the correlation between apparent binding affinities and regulation of  
 177 distinct biological processes. To this end, we performed permutation-based gene set enrichment  
 178 analyses to identify processes and pathways associated with specific transcription factor  
 179 concentrations. For each transcription factor, we detected between 780 and 1603 significantly  
 180 enriched gene sets from various databases at an FDR of 0.05 (Fig. 3a), revealing widespread gene  
 181 regulation dynamics through transcription factor concentrations. Interestingly, gene modules that

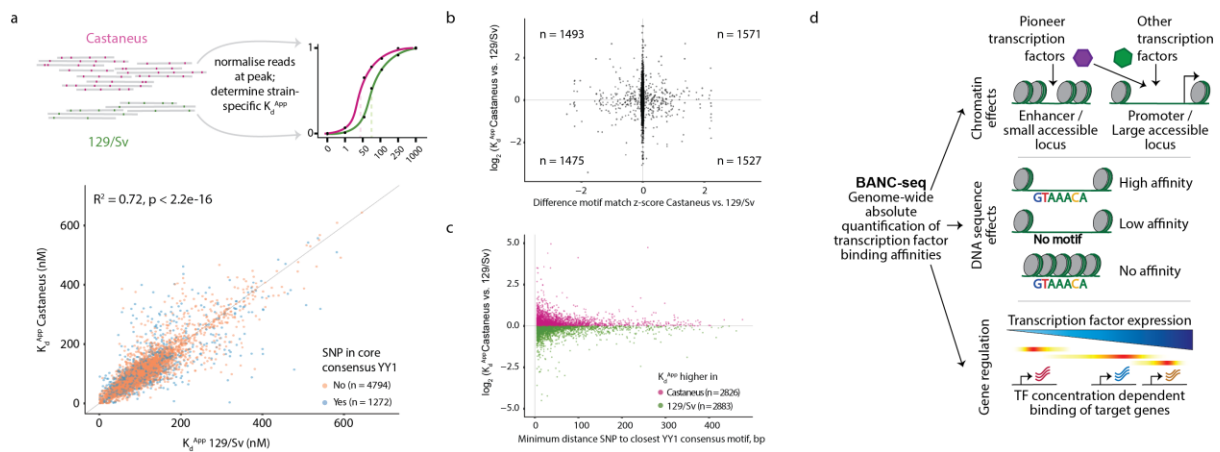

182

**Figure 4 | Consensus motifs are not the major determinants of transcription factor binding affinities.** (a) Top; analysis strategy for the determination of allele-specific  $K_d^{APPs}$ . Sequencing reads were mapped to two alleles based on the presence of SNPs and separately processed further as described for the other experiments to determine allele-specific  $K_d^{APPs}$ . Bottom; scatterplot showing allele-specific  $K_d^{APPs}$ , for sites at which high confidence  $K_d^{APPs}$  could be determined for both alleles, colour coded for whether or not a SNP was overlapping with the YY1 core consensus motif ATGG/CCAT. (b) Scatterplot representing the difference in allele-specific  $K_d^{APPs}$  (y-axis) relative to the difference in alleles-specific YY1 motif-match score (x-axis) for sites at which high confidence  $K_d^{APPs}$  could be determined for both alleles. (c) Scatter plot showing the difference in allele-specific  $K_d^{APPs}$  (y-axis) relative to the smallest distance of a SNP to a YY1-core consensus motif within each site. (d) Summary illustrating transcription factor binding affinity regulation by the chromatin context and DNA sequence, as well as concentration dependent binding of transcription factor targets.

183 associate with high affinity transcription factor binding are often related to essential cellular processes  
 184 such as energy production, translation and metabolism (Fig. 3b-d), which could suggest that these are  
 185 ubiquitously active gene modules and only require minimal regulation. In contrast, biological  
 186 processes that are specific for specialized cell types are more frequently associated with lower affinity  
 187 binding sites, indicating that they can be activated in the cells that require them by increasing the  
 188 transcription factor concentration towards the higher nanomolar range. In addition to biological  
 189 processes, we identify hundreds of gene sets for transcription factor targets (TFT database) (Fig. 3a),  
 190 which implies that depending on their concentration, transcription factors can cooperate with other  
 191 transcription factors to activate target genes to establish complex gene regulatory networks. The most  
 192 prominent example of this in our data is FOXA1, which associates with 203 transcription factor target  
 193 modules. This is in line with the pioneering function of FOXA1, known to cooperate with other  
 194 transcription factors to enable and regulate binding at their respective target genes<sup>25</sup>. Moreover,  
 195 analysis of target gene sets of FOXA1 highlighted histone H3 acetylation and ATP-dependent  
 196 chromatin remodelling, suggesting that positive feedback loops at the level of chromatin remodelling  
 197 may stimulated by FOXA1 transcription factor activity in MCF-7. Together, these results underscore  
 198 the potential of concentration dependent binding of transcription factors to their targets and  
 199 subsequent activation of distinct biological processes in a concentration dependent manner.

## 200 DNA sequence fine-tunes binding affinities

201 Given the fact that most if not all transcription factors interact with specific DNA motifs, we  
 202 investigated the contribution of DNA sequences to transcription factor binding affinities by performing  
 203 motif searches on high and low affinity binding sites for all transcription factors used in this study  
 204 (Extended Data Fig. 5). Interestingly, while high affinity binding motifs were specific for the different  
 205 examined transcription factors and consisted of the consensus motifs of the respective transcription



206 factors, motifs associated with low affinity binding sites were similar in the different experiments (e.g.  
207 the common promoter CCAAT motif, which was enriched in low affinity binding sites of SP1, YY1 and  
208 MYC). This was in line with our earlier observation that low affinity binding of YY1, SP1 and MYC  
209 frequently map to the same promoter region (**Extended Data Fig. 2d**). Together, this indicates that at  
210 high expression levels, transcription factors will bind accessible chromatin regions independently of  
211 the presence of transcription factor binding motifs, underlining the dominant effect of the epigenome  
212 landscape of transcription factor binding.

213 Next, we hypothesized that small variations in the DNA sequence in or around consensus motifs may  
214 fine-tune apparent binding affinities. To investigate this, we made use of Castaneus/129/Sv hybrid  
215 mouse embryonic stem cells<sup>29</sup> (further referred to as F121) to identify apparent binding affinity  
216 quantitative trait loci (QTLs). After aligning sequencing reads to either Castaneus or 129/Sv based on  
217 SNPs, we were able to determine allele-specific  $K_d^{Apps}$  for 6066 sites (**Fig. 4a**). We identified 1272 QTLs  
218 that contain SNPs in the core consensus motif of YY1 (ATGG/CCAT). In the example shown in **Extended**  
219 **Data Fig. 6a**, we identified an almost two-fold higher apparent binding affinity in the Castaneus allele  
220 for Qars promoter, which contained two additional YY1 binding motifs in the tested site. We could  
221 validate these results by DNA affinity purifications followed by quantitative mass spectrometry, in  
222 which Yy1 showed a two-fold enrichment when bound to this sequence compared to the sequence  
223 from the 129/Sv allele (**Extended Data Fig. 6b**). However, almost 5000 sites that displayed allele-  
224 specific  $K_d^{Apps}$  carry SNPs outside the core YY1 motif, indicating that for most sites, sequence variations  
225 in the YY1 motif alone does not account for the observed allele-specific variation in  $K_d^{Apps}$ . Indeed,  
226 differences in allele-specific motif-scores of the YY1 motif did not correlate with differences in allele-  
227 specific  $K_d^{Apps}$  (**Fig. 4b**, Spearman correlation  $r = 0.00$ ,  $p$ -value = 0.87;  $X^2$ -test  $p$ -value = 0.94). However,  
228 when we further investigated sites in which SNPs were adjacent to, but not overlapping with the YY1  
229 motif, we observed that differences in allele-specific  $K_d^{Apps}$  were larger for sites where the SNP and YY1  
230 motif were located close to each other (**Fig. 4c**). This finding suggests that binding of other  
231 transcription factors in the vicinity of putative YY1 binding sites influence the binding of YY1 itself.  
232 Together, this indicates that small sequence variations influence the binding of YY1 and its co-factors  
233 or interaction partners, thereby fine-tuning the binding affinity of YY1. However, this DNA sequence-  
234 based fine-tuning process is in turn subjugated to epigenetic marking at *cis*-acting regulatory regions  
235 for YY1.

236 In summary, we have established a sequencing based method called BANC-seq that adds a  
237 quantitative dimension to genome-wide transcription factor biology. By employing BANC-seq to  
238 transcription factors FOXA1, SP1, YY1 and MYC/MAX in different cellular contexts, we show that the  
239 chromatin landscape is the major determinant for high affinity transcription factor binding, while  
240 sequence motifs appear to be secondary in the regulation of binding to DNA (**Fig. 4d**). Furthermore,  
241 we have identified  $K_d^{Apps}$ -range specific gene sets for different transcription factors, strongly supporting  
242 the model that the expression level of a transcription factor influences activation of larger subsets of  
243 target genes as a function of its apparent affinity for the pre-existing chromatin environment.

## 244 Discussion

245 The *in vivo* protein-DNA interaction landscape is affected by different factors including DNA sequence,  
246 chromatin state and organization, and transcription factor abundances. The BANC-seq method that  
247 we have developed here allows a quantitative assessment of the interplay between these three

248 factors in a genome-wide manner. The ability to profile genome-wide absolute binding affinities in a  
249 native chromatin context provides a currently missing quantitative link between transcription factor  
250 expression and target gene regulation.

251 A key principle of the BANC-seq methodology is exogenous addition of a tagged transcription factor  
252 to permeabilized native nuclei, which also contain the endogenous transcription factor of interest.  
253 Here, the exogenous and endogenous transcription factor will compete for protein and DNA binding  
254 and in time a binding equilibrium is established in which the fraction of bound FLAG-tagged  
255 transcription factor at any given time will be steady, depending on the added concentration.  
256 Importantly, residence time for most transcription factors at their binding sites is in the order of  
257 seconds<sup>30</sup>, which indicates there is sufficient time to establish a binding equilibrium using our protocol.  
258 In practice this means that, as long as a binding equilibrium is established, the expression level of the  
259 endogenous transcription factor will not affect the  $K_d^{APP}$  determination.

260 While we show that the chromatin context has a strong impact on genome-wide transcription factor  
261 binding affinities, we cannot exclude that BANC-seq potentially underestimates binding affinities due  
262 to technical reasons. For example, the experimental conditions in which binding assays are performed  
263 greatly influence the detected apparent  $K_d^{APPs}$ . We performed our BANC-seq experiments in near  
264 physiological conditions, that is at 37°C, with high salt, protein and DNA concentrations. Indeed,  
265 performing assays at lower temperatures or salt concentrations, greatly influences observed binding  
266 affinities<sup>20,21,31,32</sup>. This is further illustrated by the binding affinity of MYC/MAX to the E-box motif,  
267 which reduces 20-fold when tested in phosphate-buffered saline (PBS, used in this study) compared  
268 to tris-buffered saline (TBS)<sup>33</sup>. Therefore, since the determined affinities are apparent to this method  
269 and possibly deviate from *in vitro* assays because we measure in complex protein mixtures, with  
270 additional unknown effectors, we refer to apparent dissociation constants ( $K_d^{APPs}$ ) throughout this  
271 manuscript.

272 Nevertheless, it is important to evaluate previously reported low nanomolar  $K_d$  values in the context  
273 of the size of the genome. For example, there are over 250,000 CACGTG and 25,000,000 CCAT  
274 (MYC/MAX and YY1 binding motif, respectively) motifs in the human genome, while (depending on  
275 the nuclear volume<sup>34</sup> used for the calculation) only ~400 transcription factor molecules are expected  
276 to be present in the nucleus at a concentration of 3nM (lowest reported  $K_d$  for YY1<sup>24</sup>). If high affinity  
277 binding to consensus motifs could already occur at this concentration, MYC and YY1 would be  
278 outnumbered by the number of potential binding sites by several orders of magnitude, creating a  
279 regulatory system that would be completely dominated by stochasticity. These observations also  
280 highlight the essentiality of measuring binding affinities in the context of chromatinized DNA at near  
281 physiological conditions to obtain a fundamental understanding on how epigenome organization  
282 regulates transcription factor binding.

283 In summary, BANC-seq represents a powerful technology to generate quantitative maps of  
284 transcription factor binding affinities across the genome and its associated epigenetic landscape. As  
285 exemplified in this study, these maps reveal fundamental insights concerning transcription factor  
286 biology and epigenetics. In addition, BANC-seq will aid the interpretation of future studies that  
287 observe epigenome remodelling or transcription factor expression dynamics. Such data will bridge  
288 absolute transcription factor expression dynamics, as determined absolute mass spectrometry-based  
289 proteomics<sup>35-38</sup>, to regulatory networks and substantially improve the accuracy of predicting genome-

290 wide transcription factor binding. The observation that gene expression patterns are regulated by  
291 distinct binding affinities at regulatory elements indicates that it is essential to incorporate BANC-seq  
292 data and epigenome profiling data in order to build relevant gene regulatory networks that accurately  
293 model gene regulation by a transcription factor.

## 294 References

- 295 1. Slattery, M. *et al.* Absence of a simple code: how transcription factors read the genome.  
296 *Trends in biochemical sciences* **39**, 381–399 (2014).
- 297 2. Lappalainen, T. Functional genomics bridges the gap between quantitative genetics and  
298 molecular biology. *Genome Research* **25**, 1427–1431 (2015).
- 299 3. Serebreni, L. & Stark, A. Insights into gene regulation: From regulatory genomic elements to  
300 DNA-protein and protein-protein interactions. *Current Opinion in Cell Biology* **70**, 58–66  
301 (2021).
- 302 4. Buenrostro, J. D., Wu, B., Chang, H. Y. & Greenleaf, W. J. ATAC-seq: A Method for Assaying  
303 Chromatin Accessibility Genome-Wide. *Current Protocols in Molecular Biology* **109**, 21.29.1-  
304 21.29.9 (2015).
- 305 5. Skene, P. J. & Henikoff, S. An efficient targeted nuclease strategy for high-resolution mapping  
306 of DNA binding sites. *eLife* **6**, (2017).
- 307 6. Belton, J. M. *et al.* Hi-C: a comprehensive technique to capture the conformation of genomes.  
308 *Methods (San Diego, Calif.)* **58**, 268–276 (2012).
- 309 7. Makowski, M. M. *et al.* Global profiling of protein-DNA and protein-nucleosome binding  
310 affinities using quantitative mass spectrometry. *Nature communications* **9**, (2018).
- 311 8. Jolma, A. *et al.* DNA-binding specificities of human transcription factors. *Cell* **152**, 327–339  
312 (2013).
- 313 9. Cheng, C. *et al.* Understanding transcriptional regulation by integrative analysis of  
314 transcription factor binding data. *Genome research* **22**, 1658–1667 (2012).
- 315 10. Zhu, F. *et al.* The interaction landscape between transcription factors and the nucleosome.  
316 *Nature* **562**, 76–81 (2018).
- 317 11. Zaret, K. S. & Mango, S. E. Pioneer transcription factors, chromatin dynamics, and cell fate  
318 control. *Current Opinion in Genetics & Development* **37**, 76–81 (2016).
- 319 12. Wunderlich, Z. & Mirny, L. A. Different gene regulation strategies revealed by analysis of  
320 binding motifs. *Trends in genetics : TIG* **25**, 434–440 (2009).
- 321 13. Keilwagen, J., Posch, S. & Grau, J. Accurate prediction of cell type-specific transcription factor  
322 binding. *Genome Biology* **20**, 1–17 (2019).
- 323 14. Stormo, G. D. & Zhao, Y. Determining the specificity of protein–DNA interactions. *Nature*  
324 *Reviews Genetics* **2010 11:11** **11**, 751–760 (2010).
- 325 15. Fried, M. & Crothers, D. M. Equilibria and kinetics of lac repressor-operator interactions by  
326 polyacrylamide gel electrophoresis. *Nucleic acids research* **9**, 6505–6525 (1981).

- 327 16. Maerkl, S. J. & Quake, S. R. A systems approach to measuring the binding energy landscapes  
328 of transcription factors. *Science (New York, N.Y.)* **315**, 233–237 (2007).
- 329 17. Quang, D. & Xie, X. FactorNet: A deep learning framework for predicting cell type specific  
330 transcription factor binding from nucleotide-resolution sequential data. *Methods* **166**, 40–47  
331 (2019).
- 332 18. Geertz, M. & Maerkl, S. J. Experimental strategies for studying transcription factor-DNA  
333 binding specificities. *Briefings in functional genomics* **9**, 362–373 (2010).
- 334 19. Weintraub, A. S. *et al.* YY1 Is a Structural Regulator of Enhancer-Promoter Loops. *Cell* **171**,  
335 1573-1588.e28 (2017).
- 336 20. Golebiowski, F. M. *et al.* An investigation of the affinities, specificity and kinetics involved in  
337 the interaction between the Yin Yang 1 transcription factor and DNA. *The FEBS journal* **279**,  
338 3147–3158 (2012).
- 339 21. Houbaviy, H. B. & Burley, S. K. Thermodynamic analysis of the interaction between YY1 and  
340 the AAV P5 promoter initiator element. *Chemistry & biology* **8**, 179–187 (2001).
- 341 22. Lace, M. J. *et al.* Cellular factor YY1 downregulates the human papillomavirus 16 E6/E7  
342 promoter, P97, in vivo and in vitro from a negative element overlapping the transcription-  
343 initiation site. *The Journal of general virology* **90**, 2402–2412 (2009).
- 344 23. Usheva, A. & Shenk, T. YY1 transcriptional initiator: protein interactions and association with  
345 a DNA site containing unpaired strands. *Proceedings of the National Academy of Sciences of  
346 the United States of America* **93**, 13571–13576 (1996).
- 347 24. Belak, Z. R. & Ovsenek, N. Assembly of the Yin Yang 1 transcription factor into messenger  
348 ribonucleoprotein particles requires direct RNA binding activity. *The Journal of biological  
349 chemistry* **282**, 37913–37920 (2007).
- 350 25. Cirillo, L. A. *et al.* Opening of Compacted Chromatin by Early Developmental Transcription  
351 Factors HNF3 (FoxA) and GATA-4. *Molecular Cell* **9**, 279–289 (2002).
- 352 26. Seachrist, D. D., Anstine, L. J. & Keri, R. A. FOXA1: A Pioneer of Nuclear Receptor Action in  
353 Breast Cancer. *Cancers* **13**, (2021).
- 354 27. Lupien, M. *et al.* FoxA1 Translates Epigenetic Signatures into Enhancer-Driven Lineage-  
355 Specific Transcription. *Cell* **132**, 958–970 (2008).
- 356 28. Fu, X. *et al.* FOXA1 upregulation promotes enhancer and transcriptional reprogramming in  
357 endocrine-resistant breast cancer. *Proceedings of the National Academy of Sciences of the  
358 United States of America* **116**, 26823–26834 (2019).
- 359 29. Rivera-Mulia, J. C. *et al.* Allele-specific control of replication timing and genome organization  
360 during development. *Genome Research* **28**, 800–811 (2018).
- 361 30. Phair, R. D. *et al.* Global nature of dynamic protein-chromatin interactions in vivo: three-  
362 dimensional genome scanning and dynamic interaction networks of chromatin proteins.  
363 *Molecular and cellular biology* **24**, 6393–6402 (2004).

- 364 31. Papanephytous, C. P., Grigoroudis, A. I., McInnes, C. & Kontopidis, G. Quantification of the  
365 effects of ionic strength, viscosity, and hydrophobicity on protein-ligand binding affinity. *ACS*  
366 *medicinal chemistry letters* **5**, 931–936 (2014).
- 367 32. Banerjee, A., Hu, J. & Goss, D. J. Thermodynamics of protein-protein interactions of cMyc,  
368 Max, and Mad: effect of polyions on protein dimerization. *Biochemistry* **45**, 2333–2338  
369 (2006).
- 370 33. Kyung, C. J., Ho, S. R., Chi, H. P. & Yang, C. H. Determination of the dissociation constants for  
371 recombinant c-Myc, Max, and DNA complexes: the inhibitory effect of linoleic acid on the  
372 DNA-binding step. *Biochemical and biophysical research communications* **334**, 269–275  
373 (2005).
- 374 34. Fujioka, A. *et al.* Dynamics of the Ras/ERK MAPK Cascade as Monitored by Fluorescent  
375 Probes. *Journal of Biological Chemistry* **281**, 8917–8926 (2006).
- 376 35. Smits, A. H. *et al.* Global absolute quantification reveals tight regulation of protein expression  
377 in single *Xenopus* eggs. *Nucleic acids research* **42**, 9880–9891 (2014).
- 378 36. Lindeboom, R. G. *et al.* Integrative multi-omics analysis of intestinal organoid differentiation.  
379 *Molecular Systems Biology* **14**, e8227 (2018).
- 380 37. Bonnet, J. *et al.* Quantification of Proteins and Histone Marks in *Drosophila* Embryos Reveals  
381 Stoichiometric Relationships Impacting Chromatin Regulation. *Developmental Cell* **51**, 632-  
382 644.e6 (2019).
- 383 38. Schwanhüusser, B. *et al.* Global quantification of mammalian gene expression control. *Nature*  
384 *2011 473:7347* **473**, 337–342 (2011).

385

## 386 **Methods**

387

### 388 **Cell culture**

389 Human MCF-7 cells were grown in DMEM (Gibco) supplemented with 10% fetal bovine serum (GE  
390 Healthcare Life Sciences) and 1X penicillin–streptomycin (Gibco). F121 mouse embryonic stem cells  
391 were grown on 0.15% gelatin coated dishes in DMEM (Gibco) supplemented with 15 % fetal bovine  
392 serum (GE Healthcare Life Sciences), 5  $\mu$ M beta mercaptoethanol (Sigma), 1X non-essential amino  
393 acids (Lonza), 1X Glutamax, 1 mM sodium pyruvate (Gibco), 10 mM HEPES, 1X penicillin–streptomycin  
394 (Gibco) and in-house generated Leukemia Inhibitory Factor (LIF). At ~80% confluency, the cells were  
395 washed once with PBS, scraped from the plate, collected and washed twice with cold PBS, after which  
396 they were aliquoted and cryopreserved in HyClone fetal bovine serum with 10 % DMSO at -80°C until  
397 further processing.

398 For DNA pulldown followed by mass spectrometry, we harvested cells and prepared nuclear extracts  
399 as described previously<sup>39</sup>.

### 400 **Transcription factor binding**

401 Cryopreserved cells were thawed quickly at 37°C and washed twice with ice-cold PBS. All subsequent  
402 steps were performed on ice unless stated otherwise. Cell membranes were lysed by adding 900  $\mu$ l of  
403 ice-cold hypotonic lysis buffer containing 10 mM Tris/HCl at pH 7.5, 10 mM NaCl, 3 mM MgCl<sub>2</sub> and 0.1

404 % IGEPAL ca-630. Nuclei were isolated by pipetting up and down 20 times, followed by centrifugation  
405 at 250 x g for 10 minutes at 4°C. Isolated nuclei were resuspended and counted in ice-cold PBS, to  
406 aliquot 2 x 10<sup>6</sup> or 2.5 x 10<sup>5</sup> nuclei per concentration in separate tubes for either CHIP-based or  
407 CUT&RUN-based follow up, respectively. Each tube with nuclei was resuspended in the following ice-  
408 cold incubation buffer to a volume of 20 µl: 1 % BSA, 1 mM CaCl<sub>2</sub>, 5 mM MgCl<sub>2</sub>, 1 µM ZnCl<sub>2</sub>, 0.1 %  
409 IGEPAL ca-630, 1× EDTA-free protease inhibitor cocktail (cOmplete, Roche), 1× PBS, supplemented  
410 with protein-of-interest at a designated concentration in diluted protein storage buffer. Recombinant  
411 FLAG-YY1 (Active Motif, Cat. nr. 81119), FLAG-MYC/MAX (Active Motif, Cat. nr. 81087), FLAG-SP1  
412 (Active Motif, Cat. nr. 81181) or FLAG-FOXA1 (OriGene Technologies Inc, Cat. nr. TP306045), were  
413 diluted to the highest tested concentration with ddH<sub>2</sub>O, and further diluted in protein storage buffer  
414 of the respective supplier to ensure that the buffer conditions of all concentrations were identical. To  
415 improve complete nuclear permeabilization and diffusion of the protein of interest into the nuclei, the  
416 nuclei were briefly sonicated for 5 seconds at 4°C in a Bioruptor Pico sonicator (Diagenode).  
417 Permeabilized nuclei were incubated for 10 minutes at 37°C in a thermoshaker, rocking at 1000 rpm.

#### 418 **Chromatin immunoprecipitation (ChIP)-based follow up**

419 While shaking the nuclei at 37°C, chromatin was cross-linked by adding 1% formaldehyde to a final  
420 concentration of 1% (v/v) followed by incubation for 4 minutes and quenching by adding 0.1 volumes  
421 of 1.25 M glycine. Chromatin was recovered with an ethanol precipitation with 0.1 volumes of sodium  
422 acetate and 3 volumes of ice-cold ethanol at -20°C for 15 minutes, followed by ten minutes  
423 centrifugation at max speed. After washing once with ice-cold 70% ethanol, the purified chromatin  
424 was dissolved by shaking at 37°C in the following sonication buffer: 20mM Hepes at pH 7.6, 1% SDS  
425 and 0.25× EDTA-free protease inhibitor cocktail (cOmplete, Roche). Chromatin was sheared in a  
426 Bioruptor Pico sonicator (Diagenode) at 4°C by 5 cycles of 30 s ON, 30 s OFF.

427 A ChIP master mix was added to each chromatin sample to achieve the following final conditions for  
428 each ChIP reaction: 0.1% BSA, 1 x EDTA-free protease inhibitor cocktail (cOmplete, Roche), 1 µg anti-  
429 Flag antibody (clone M2, Sigma), 1 µg anti-H2Av antibody (spike-in antibody, Active Motif), 10 ng  
430 spike-in chromatin (*D.melanogaster*, Active motif) and 1× incubation buffer (0.15% SDS, 1% TritonX-  
431 100, 150mM NaCl, 1mM EDTA, 0.5mM EGTA, 20mM HEPES). ChIP reactions were incubated by  
432 rotating overnight at 4 °C. To each sample, 15 µl of a 1:1 mix of Protein A and Protein G Dynabead  
433 (Invitrogen) was added followed by a 90 minute incubation at 4 °C. On ice, the beads were washed 2×  
434 with Wash Buffer 1 (0.1% SDS, 0.1% sodium deoxycholate, 1% Triton, 150 mM NaCl, 1 mM EDTA,  
435 0.5 mM EGTA, and 20 mM HEPES), 1× with wash buffer 2 (wash buffer 1 with 500 mM NaCl), 1× with  
436 wash buffer 3 (250 mM LiCl, 0.5% sodium deoxycholate, 0.5% NP-40, 1 mM EDTA, 0.5 mM EGTA, and  
437 20 mM HEPES), and 2× with wash buffer 4 (1 mM EDTA, 0.5 mM EGTA, and 20 mM HEPES). After  
438 washing, chromatin was eluted from the beads at room temperature by incubating them for 20  
439 minutes in a thermoshaker at 1400 rpm in 100 µl of the following buffer: 1% SDS, 0.1 M NaHCO<sub>3</sub>. The  
440 supernatant was decrosslinked overnight at 65°C in a thermoshaker at 1000 rpm by adding 20 µg of  
441 proteinase K and 4 µl of 5M NaCl. Decrosslinked DNA was purified by column purification (Zymo) and  
442 used for quantitative reverse transcription PCR (qPCR; hPTBP1 promoter:  
443 GTTTCCTGCCCGACTCCAAGAT and GAGGGGGAGAAAATGGGATCACG; gene desert:  
444 AACTGGCTAGTAAGGAGTGAATG and GGGAAATGGAAAGAAGTCCACTAT) or next-generation  
445 sequencing sample preparation.

#### 446 **CUT&RUN-based follow up**

447 Nuclei were placed on ice immediately after the 10-minute incubation with the transcription factor of  
448 interest. Ice-cold wash buffer 1 (150 mM NaCl, 20 mM Hepes pH 7.5, 0.5 mM Spermidine, 0.2 mM  
449 TritonX-100, 2 mM EDTA pH 8, 1 x EDTA-free protease inhibitor cocktail) containing 1  $\mu$ g anti-Flag  
450 antibody (clone M2, Sigma) was added to the nuclei to a total volume of 400  $\mu$ l and incubated in a  
451 rotation wheel overnight at 4 °C. Then, inspired by the original CUT&RUN protocol<sup>5</sup>, each sample was  
452 washed 2x with 300  $\mu$ l of ice-cold wash buffer 2 (150 mM NaCl, 20 mM Hepes pH 7.5, 0.5 mM  
453 Spermidine, 0.2 mM TritonX-100, 1 x EDTA-free protease inhibitor cocktail), followed by incubation  
454 with 150  $\mu$ l of wash buffer 2, supplemented with 1.5  $\mu$ l in-house generated recombinant pAG-MNase  
455 (diluted in wash buffer 2 to the working concentration), rotating at 4 °C for one hour. Samples were  
456 washed again 2x with wash buffer 2, and MNase was activated by adding 100  $\mu$ l of wash buffer 3 (150  
457 mM NaCl, 20 mM Hepes pH 7.5, 0.5 mM Spermidine, 0.2 mM TritonX-100, 2 mM CaCl<sub>2</sub>). The digestion  
458 reaction was performed for 30 minutes at 4 °C, and stopped by adding 100  $\mu$ l 2X Stop buffer (final  
459 concentration 170 mM NaCl, 10 mM EDTA, 2.5 mM EGTA, 0.025 % digitonin), supplemented with 15  
460 pg spike-in DNA per sample (*S.cerevisiae*, Cell Signaling Technologies), with exception of the YY1  
461 experiment in MCF-7. Samples were incubated at 37 °C for 30 minutes to release digested DNA  
462 fragments, followed by max speed centrifugation at 4 °C for 5 minutes and DNA purification by column  
463 purification (Zymo) prior to sample preparation for next-generation sequencing.

#### 464 **Library preparation and sequencing**

465 BANC-seq libraries were prepared using the Kapa Hyper Prep Kit (Kapa Biosystems) according to  
466 manufacturer's protocol, with the following modifications. All input material after column purification  
467 was used to prepare libraries and depending in the concentration of the starting material, 2.5  $\mu$ l or 5  
468  $\mu$ l of the NEXTflex adapter stock (600nM, Bioo Scientific) was used for adapter ligation of each sample.  
469 Libraries were amplified with 12 PCR cycles, followed up with one reverse and a double post-  
470 amplification clean-up was used to ensure proper removal of adapters. Samples were analyzed for  
471 purity using a High Sensitivity DNA Chip on a Bioanalyzer 2100 system (Agilent). Libraries were paired-  
472 end sequenced on an Illumina NextSeq500.

#### 473 **Mass spectrometry based whole cell or nucleus proteomics**

474 Sample pellets from 2 million cells were taken before and after the hypotonic lysis step in the nuclear  
475 isolation procedure. Pellets were dissolved in 50  $\mu$ l lysis buffer (4 % SDS, 0.1 M Hepes at pH 7.6 and  
476 0.1 M DTT) by boiling at 95°C for 5 minutes followed by 5 sonication cycles of 30 s ON / 30 s OFF on  
477 the Bioruptor Pico sonicator (Diagenode) at 4°C. We added 1.25 $\mu$ g Universal Proteomics Standard-2  
478 (Sigma) spike-in to each sample for absolute copy number quantification per cell and nucleus. Proteins  
479 were digested and cleaned for mass spectrometry analysis using the filter assisted sample preparation  
480 (FASP<sup>40</sup>). In short, dissolved proteins were denatured in 8 M urea, loaded on a 30 kDa filter, and  
481 alkylated with 50 mM iodoacetic acid. The filter was washed three times with urea buffer and three  
482 times with 50 mM ammonium bicarbonate buffer, followed by overnight trypsin digestion (Promega)  
483 and collection in ammonium bicarbonate buffer. Peptides were acidified with trifluoroacetic acid and  
484 desalted on C18 (Empore) StageTips<sup>41</sup>. For each sample, peptides were separated on an online Easy-  
485 nLC 1000 (Thermo Scientific) using a 4-minute (7 % to 9 %) acetonitrile gradient, followed by a 214  
486 min gradient of acetonitrile (9 % to 32 %), followed by washes at 50 % and 95 % acetonitrile for 240  
487 min of total data collection. Mass spectra between 350 to 1300 m/z were collected on a Q-Exactive  
488 HFX mass spectrometer (Thermo Scientific) in Top20 mode with a full-MS and dd-MS<sup>2</sup> resolution of  
489 120,000 and 15,000, respectively. Acquired mass spectra were analyzed with MaxQuant 1.6.0.1<sup>42</sup> with

490 default settings and by searching the human Uniprot protein database downloaded in June 1017, and  
491 with the spike-in protein database supplied by the manufacturer. Intensity based absolute  
492 quantification was performed as described in<sup>35</sup>, by extrapolating the absolute abundance of each  
493 protein from a linear regression between the log-transformed iBAQ<sup>43</sup> values and the log-transformed  
494 concentrations of the spike-in proteins. Detected transcription factor proteins were identified with  
495 the TFCheckpoint database<sup>44</sup>, version 'TFCheckpoint\_download\_180515', by selecting proteins in the  
496 class 'TFclass'.

#### 497 **Sequence data processing, quantification and spike-in normalisation**

498 Pre-processing of generated sequencing data was performed automatically with workflow  
499 tool seq2science v0.5.4<sup>45</sup>. Briefly, paired-end reads were trimmed with fastp v0.20.1 with default  
500 options. Reads were aligned to the hg38 or mm10 reference genome, as well as to the respective  
501 spike-in genome for each experiment (*S.cerevisiae*-74-D694-2.0, dm6 or *E.coli*\_C142) with bwa-mem2  
502 v2.1 with options '-M'. Mapped reads were removed if they did not have a minimum mapping quality  
503 of 30, were a (secondary) multimapper or aligned inside the ENCODE blacklist. Afterwards, duplicate  
504 reads were removed with Picard MarkDuplicates v2.23.8. Peaks were called with macs2 v2.2.7 with  
505 options '--keep-dup 1 --buffer-size 10000 --call-summits' in BAMPE mode. Samtools v1.9 was used to  
506 quantify total read counts per sample for target (hg38 or mm10) and designated spike-in (*S.cerevisiae*-  
507 74-D694-2.0, dm6 or *E.coli*\_C142) genome. Subsequent analyses were performed in R (v 4.0.3) and  
508 data was visualised with the ggplot2 and ComplexHeatmap<sup>46</sup> packages, unless stated otherwise.

509 For read quantification at transcription factor binding sites, we used the peak locations of the sample  
510 with the highest transcription factor concentration. To prevent peak size bias in downstream analyses  
511 we trimmed peaks to the median peak length of all peaks around the peak summit. For samples of  
512 each concentration we used featureCounts<sup>47</sup> v1.6.3 to count reads per peak (with options -p -C -O -g  
513 GeneID -s 0 -F SAF -B), and normalized raw counts to reads per million spike-in reads. In addition, we  
514 used bedtools to generate bigwig files that represent the spike-in normalized signal of BANC-seq  
515 samples to be visualized in the UCSC genome browser.

#### 516 **$K_d^{App}$ determination**

517 Transcription factor binding parameters were calculated with a similar approach as we reported  
518 previously for proteomics workflows<sup>7</sup>. For every peak, we scaled the normalized read counts to the  
519 sample with the highest signal. These relative fractions bound over transcription factor concentration  
520 was fitted to the following Hill-like curve:

$$521 \quad \theta = \frac{1}{\left(\frac{K_d^{App}}{[L]}\right)^n + 1}$$

522 In this formula  $\theta$  represents the observed relative fraction of bound transcription factor,  $[L]$  represents  
523 the known transcription factor concentration,  $K_d^{App}$  is the apparent dissociation constant describing  
524 the concentration at which half of the DNA is bound by the transcription factor, and  $n$  is the Hill  
525 coefficient describing the rate at which binding saturates. The unknown parameters  $n$  and  $K_d^{App}$  were  
526 fit using non-linear least squares regression with the nlsLM function in the minpack.lm R package<sup>48</sup>.  
527 Starting values of  $n$  and  $K_d^{App}$  were set to 1 and a maximum of 50 iterations were performed. For  
528 follow-up analyses and visualisations, we included high confidence sites only ( $p < 0.01$ ,  $r > 0.9$ ).



## 529 **Allele-specific $K_d^{App}$ analysis**

530 To determine allele-specific  $K_d^{App}$ s we used information on SNP locations from either 129S1/SvlmJ  
531 (hereafter referred to as 129/Sv) or CAST/EiJ (hereafter referred to as Castaneus) and the GATK<sup>49</sup> tool  
532 *FastaAlternateReferenceMaker* to create two reference genomes based on mm10, in which each  
533 base overlapping with a SNP was replaced by the alternative base. Sequencing data from the  
534 experiment performed with F121 mESC were then processed for both references with the seq2science  
535 tool as described above. Before quantifying reads at peak locations, we removed reads (and their  
536 respective read mate) that had at least one mismatch to retain only reads perfectly aligning to either  
537 new reference with samtools.

## 538 **Peak annotation**

539 The predicted regulatory function of identified binding sites was inferred by overlapping them with  
540 regulatory features in the Ensembl Regulatory Build<sup>50</sup> of version GRCh38.MCF\_7.20210107 for MCF-7  
541 experiments and GRCm39.ES\_Bruce4\_embryonic.20201021 for F121 experiments. To overlap the  
542 latter, we first converted the mm10 mapped peak coordinates to mm39 via the UCSC liftOver tool. If  
543 a peak overlapped with more than one regulatory feature, it was assigned the one feature that had  
544 the highest rank in the order of 'Promoter, Enhancer, Promoter flanking region, Open chromatin  
545 region, CTCF binding site, Transcription factor binding site'. To detect overlap between high and low  
546 affinity assigned promoters per transcription factor, we first combined YY1 bound sites from both the  
547 CHIP-seq and CUT&RUN-based follow up experiment. Then, we selected promoters only, and  
548 separately for the 20% lowest and highest affinity promoters we used the intervene<sup>51</sup> tool to generate  
549 upset plots.

## 550 **Motif analysis**

551 To identify enriched motifs in high- and low affinity binding sites, we used the binding sites with the  
552 500 lowest and highest  $K_d^{App}$ s for each experiment as input for gimme motifs<sup>52</sup> and selected the top  
553 enriched motifs per transcription factor in either high or low affinity binding sites for visualisation. To  
554 assess the effect of motif perturbations on  $K_d^{App}$ s, we determined the YY1 motif match score in both  
555 alleles of the hybrid mESCs with the scan function of gimme motifs and combined the differences in  
556 allele-specific  $K_d^{App}$ s with differences in allele-specific motif match scores. Finally, we determined the  
557 minimal distances between consensus motifs and SNPs in each binding site to combine this with  
558 differences in allele-specific  $K_d^{App}$ s, and used the SNP location closest to YY1 motifs (+/- 50 bp) as input  
559 for gimme motifs to find motifs in the vicinity of these SNPs.

## 560 **Concentration dependent target binding**

561 We used GREAT<sup>53</sup> to assign each identified binding site to a single gene whose transcription start site  
562 is the closest within 1,000,000 bp. We used the GO, GO-BP, IMMUNO, TFT, ONCO, KEGG and  
563 REACTOME data sets from MSigDB v7.2<sup>54</sup> for gene set enrichment analysis. To identify gene sets that  
564 associate with a certain transcription factor concentration, we tested if  $K_d^{App}$ s assigned to the genes  
565 within each gene set vary significantly less compared to random. To this end, we calculated the  
566 coefficient of variation of  $K_d^{App}$ s that could be assigned to genes within each gene set. Next, we shuffled  
567 the  $K_d^{App}$ s values 100,000 times and determined how often the actual coefficient of variation would be  
568 smaller than by chance, to determine a permutation based false discovery rate.

## 569 **Integrating epigenome data**

570 To integrate information on genome-wide transcription factor binding affinity with epigenome data,  
571 we downloaded hg38-mapped MCF-7 as well as mm10-mapped mESC ChIP-seq and ATAC-seq data  
572 from the ENCODE-portal. When more than one experiment for the same bait was available, we  
573 selected the experiment that had most reads sequenced. Samples that were treated with drugs or  
574 genetically modified were excluded from integration. Aligned reads were quantified with  
575 featureCounts at either transcription factor binding sites or random genomic loci, normalised to reads  
576 per million mapped reads and the average signal of 5 control samples was used to compute fold  
577 changes over control. Normalised signal of ATAC-seq or ChIP-seq data at transcription factor binding  
578 sites for which we could define high confidence  $K_d^{Apps}$  were visualized with ComplexHeatmap to  
579 visualize the histone landscape alongside different regulatory features and their associated  $K_d^{Apps}$ . In  
580 addition, we divided high confidence sites into quintiles based on  $K_d^{App}$ , and visualized the epigenome  
581 data per quintile for each experiment as boxplots. Rho ( $r$ ) and p-value from Spearman correlation of  
582 the respective epigenome signal and  $K_d^{Apps}$  are included in the boxplots.

### 583 **Overlap with endogenous ChIP-seq data**

584 To determine the overlap between binding sites of FLAG-tagged transcription factors in BANC-seq with  
585 endogenous transcription factor binding sites, we retrieved hg38-mapped ChIP-seq data from the  
586 ENCODE-portal for SP1, FOXA1, MYC and YY1. For FOXA1, we also included peaks identified after  
587 FOXA1 overexpression<sup>28</sup>. For overlap of FLAG-YY1 with endogenous mYy1 binding sites in mESCs, we  
588 computed the overlap with one ChIP-seq sample<sup>19</sup>, which we downloaded and processed with  
589 seq2science to define Yy1 binding peaks. For all data sets and experiments, bedtools was used to  
590 identify peaks that overlapped between our experiments and endogenous ChIP-seq peaks.

### 591 **DNA pulldown followed by mass spectrometry**

592 To validate sequence specific binding of Yy1, a DNA pulldown was performed as described previously<sup>39</sup>  
593 with nuclear extracts of F121 mESCs and the following DNA oligos:  
594 Cast\_Fw: TCCTATTGGTCCATGAGCAAAGGTCGCTGTTTCAGATGGGGCCCAAAGT, Cast\_Rv:  
595 ACTTTGGGCCCCATCTGAACAGCGACCTTTGCTCATGGACCAATAGGA, 129Sv\_Fw:  
596 TCCTATTGGTCAATGAGCAAAGGTCGCTGTTTCAGATGAGGCCCAAAGT, 129Sv\_Rv:  
597 ACTTTGGGCTCATCTGAACAGCGACCTTTGCTCATTGACCAATAGGA. DNA oligos were ordered via  
598 custom synthesis from Integrated DNA Technologies with 5' biotinylation of the forward strand and  
599 annealed using a 1.5 X molar excess of the reverse strand. DNA affinity purifications were performed  
600 as described previously<sup>39</sup>. In short, 500 pmol of DNA oligonucleotides were immobilized using 20  $\mu$ l of  
601 Streptavidin-Sepharose bead slurry (GE Healthcare, Chicago, IL). Then, 500  $\mu$ g of nuclear extract and  
602 10  $\mu$ g of non-specific competitor DNA (5  $\mu$ g polydAdT, 5  $\mu$ g polydIdC) were added to each pulldown.  
603 After extensive washing, samples were prepared for mass spectrometry analysis or western blotting.  
604 For mass spectrometry analysis, beads were resuspended in elution buffer (2 M urea, 100 mM TRIS  
605 (pH8), 10 mM DTT) and alkylated with 50 mM iodoacetamide. Proteins were digested on beads with  
606 0.25  $\mu$ g of trypsin for 2 hours. After elution of peptides from beads, an additional 0.1  $\mu$ g of trypsin was  
607 added and digestion was continued overnight. Peptides were labelled on Stage tips using dimethyl  
608 labelling as described previously<sup>39</sup>. Each pulldown was performed in duplicate and label swapping was  
609 performed between duplicates to avoid labelling bias. Matching light and heavy peptides were  
610 combined and analysed on an Orbitrap Exploris (Thermo) mass spectrometer with acquisition settings  
611 described previously<sup>55</sup>. RAW mass spectrometry data were analysed with MaxQuant 1.6.0.1 by  
612 searching against the UniProt curated mouse proteome (released June 2017) with standard settings.

613 Protein ratios obtained from MaxQuant were used for outlier calling. An outlier cut-off of 1.5 inter-  
614 quartile ranges in two out of two replicates was used and results were visualized with python.

615

## 616 **Methods References**

- 617 39. Makowski, M. M. *et al.* An interaction proteomics survey of transcription factor binding at  
618 recurrent TERT promoter mutations. *PROTEOMICS* **16**, 417–426 (2016).  
619
- 620 40. Wiśniewski, J. R., Zougman, A., Nagaraj, N. & Mann, M. Universal sample preparation method  
621 for proteome analysis. *Nature methods* **6**, 359–362 (2009).
- 622 41. Rappsilber, J., Mann, M. & Ishihama, Y. Protocol for micro-purification, enrichment, pre-  
623 fractionation and storage of peptides for proteomics using StageTips. *Nature protocols* **2**,  
624 1896–1906 (2007).
- 625 42. Cox, J. & Mann, M. MaxQuant enables high peptide identification rates, individualized p.p.b.-  
626 range mass accuracies and proteome-wide protein quantification. *Nature biotechnology* **26**,  
627 1367–1372 (2008).
- 628 43. Schwanhäusser, B. *et al.* Global quantification of mammalian gene expression control. (2013)  
629 doi:10.1038/nature10098.
- 630 44. Chawla, K., Tripathi, S., Thommesen, L., Lægreid, A. & Kuiper, M. TFcheckpoint: a curated  
631 compendium of specific DNA-binding RNA polymerase II transcription factors. *Bioinformatics*  
632 (*Oxford, England*) **29**, 2519–2520 (2013).
- 633 45. Sande, M. van der *et al.* seq2science. (2021) doi:10.5281/ZENODO.5788729.
- 634 46. Gu, Z., Eils, R. & Schlesner, M. Complex heatmaps reveal patterns and correlations in  
635 multidimensional genomic data. *Bioinformatics* **32**, 2847–2849 (2016).
- 636 47. Liao, Y., Smyth, G. K. & Shi, W. featureCounts: an efficient general purpose program for  
637 assigning sequence reads to genomic features. *Bioinformatics (Oxford, England)* **30**, 923–930  
638 (2014).
- 639 48. Elzhov, T. v., Mullen, K., Spiess, A. & Bolker, B. Title R interface to the Levenberg-Marquardt  
640 nonlinear least-squares algorithm found in MINPACK, plus support for bounds. *undefined*  
641 (2015).
- 642 49. van der Auwera, G., O'Connor, B. & Safari, an O. M. Company. Genomics in the Cloud. 300.
- 643 50. Zerbino, D. R., Wilder, S. P., Johnson, N., Juettemann, T. & Flicek, P. R. The ensembl  
644 regulatory build. *Genome biology* **16**, (2015).
- 645 51. Khan, A. & Mathelier, A. Intervene: A tool for intersection and visualization of multiple gene  
646 or genomic region sets. *BMC Bioinformatics* **18**, 1–8 (2017).
- 647 52. Bruse, N. & van Heeringen, S. J. GimmeMotifs: An analysis framework for transcription factor  
648 motif analysis. *bioRxiv* 474403 (2018) doi:10.1101/474403.
- 649 53. McLean, C. Y. *et al.* GREAT improves functional interpretation of cis-regulatory regions.  
650 *Nature biotechnology* **28**, 495–501 (2010).

- 651 54. Subramanian, A. *et al.* Gene set enrichment analysis: A knowledge-based approach for  
652 interpreting genome-wide expression profiles. *Proceedings of the National Academy of*  
653 *Sciences* **102**, 15545–15550 (2005).
- 654 55. Santos-Barriopedro, I., van Mierlo, G. & Vermeulen, M. Off-the-shelf proximity biotinylation  
655 for interaction proteomics. *Nature Communications* (2021) doi:10.1038/s41467-021-25338-4.

656

### 657 **Acknowledgements**

658 We thank Matthew M. Makowski, Guido van Mierlo and all members of the Vermeulen laboratory for  
659 fruitful discussions. We thank the laboratory of Joost Gribnau for sharing the hybrid mouse embryonic  
660 stem cells for this study. We thank Samy Kefalopoulou and Peter Zeller of the Hubrecht Institute for  
661 technical support with the CUT&RUN protocol. The Vermeulen laboratory is part of the OncoCode  
662 Institute which is partly financed by the Dutch Cancer Society (KWF). Furthermore, work in the  
663 Vermeulen laboratory is supported by the gravitation program CancerGenomics.nl from the  
664 Netherlands Organization for Scientific Research (NWO), and by an ERC Consolidator Grant  
665 (SysOrganoid;771059).

666

### 667 **Author Contributions**

668 R.G.H.L. and M.V. conceived the study. R.G.H.L. designed the methodology and analyses. H.K.N.  
669 adapted the methodology to the CUT&RUN based follow-up. R.G.H.L. and H.K.N. performed BANC-  
670 seq experiments and analysed the data. M.P.B. and L.A.L. prepared the sequencing libraries and  
671 performed next generation sequencing. P.W.T.C.J. and C.G. performed mass spec experiments. H.K.N.,  
672 R.G.H.L., C.G., S.J.v.H., C.L., S.A.T. and M.V. edited the manuscript.

673

### 674 **Competing Interests**

675 In the past 3 years, Sarah A. Teichmann has consulted for Genentech and Roche and sits on Scientific  
676 Advisory Boards for Qiagen, Foresite Labs, Biogen, and GlaxoSmithKline and is a co-founder and equity  
677 holder of Transition Bio.

678

679 **Supplementary Information** is available for this paper.

680

681 **Correspondence** to Rik Lindeboom or Michiel Vermeulen.

682

### 683 **Data availability**

684 Next-generation sequencing data have been deposited to the Gene Expression Omnibus (GEO) with  
685 accession code GSEXXXXXX.

686

### 687 **Code availability**

688 Data analysis script to perform  $K_d^{APP}$  determination from count files are available on  
689 <https://github.com/HNeikes/BANCseq>.

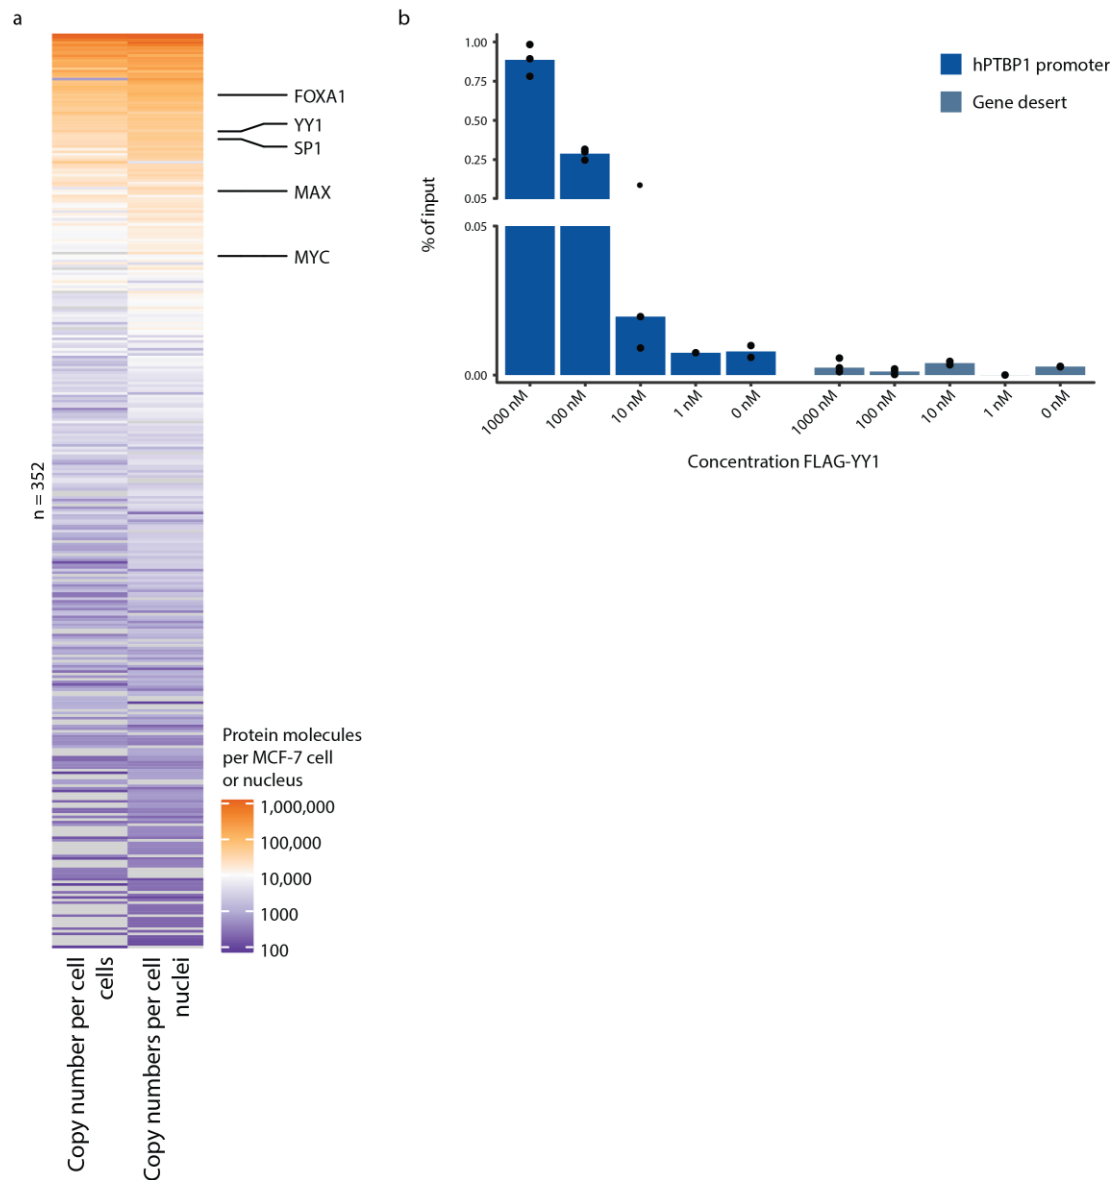

690  
691  
692  
693  
694  
695

**Extended Data Figure 1 | Technical support for the pilot BANC-seq experiment. (a)** Heatmap showing copy numbers per cell or nucleus of detected transcription factors before and after nuclear isolation. **(b)** Recovery (as percentage (%) of input chromatin) at the human PTBP1 promoter and a random genomic site by ChIP-qPCR per titration point of FLAG-YY1 in MCF-7 cells.

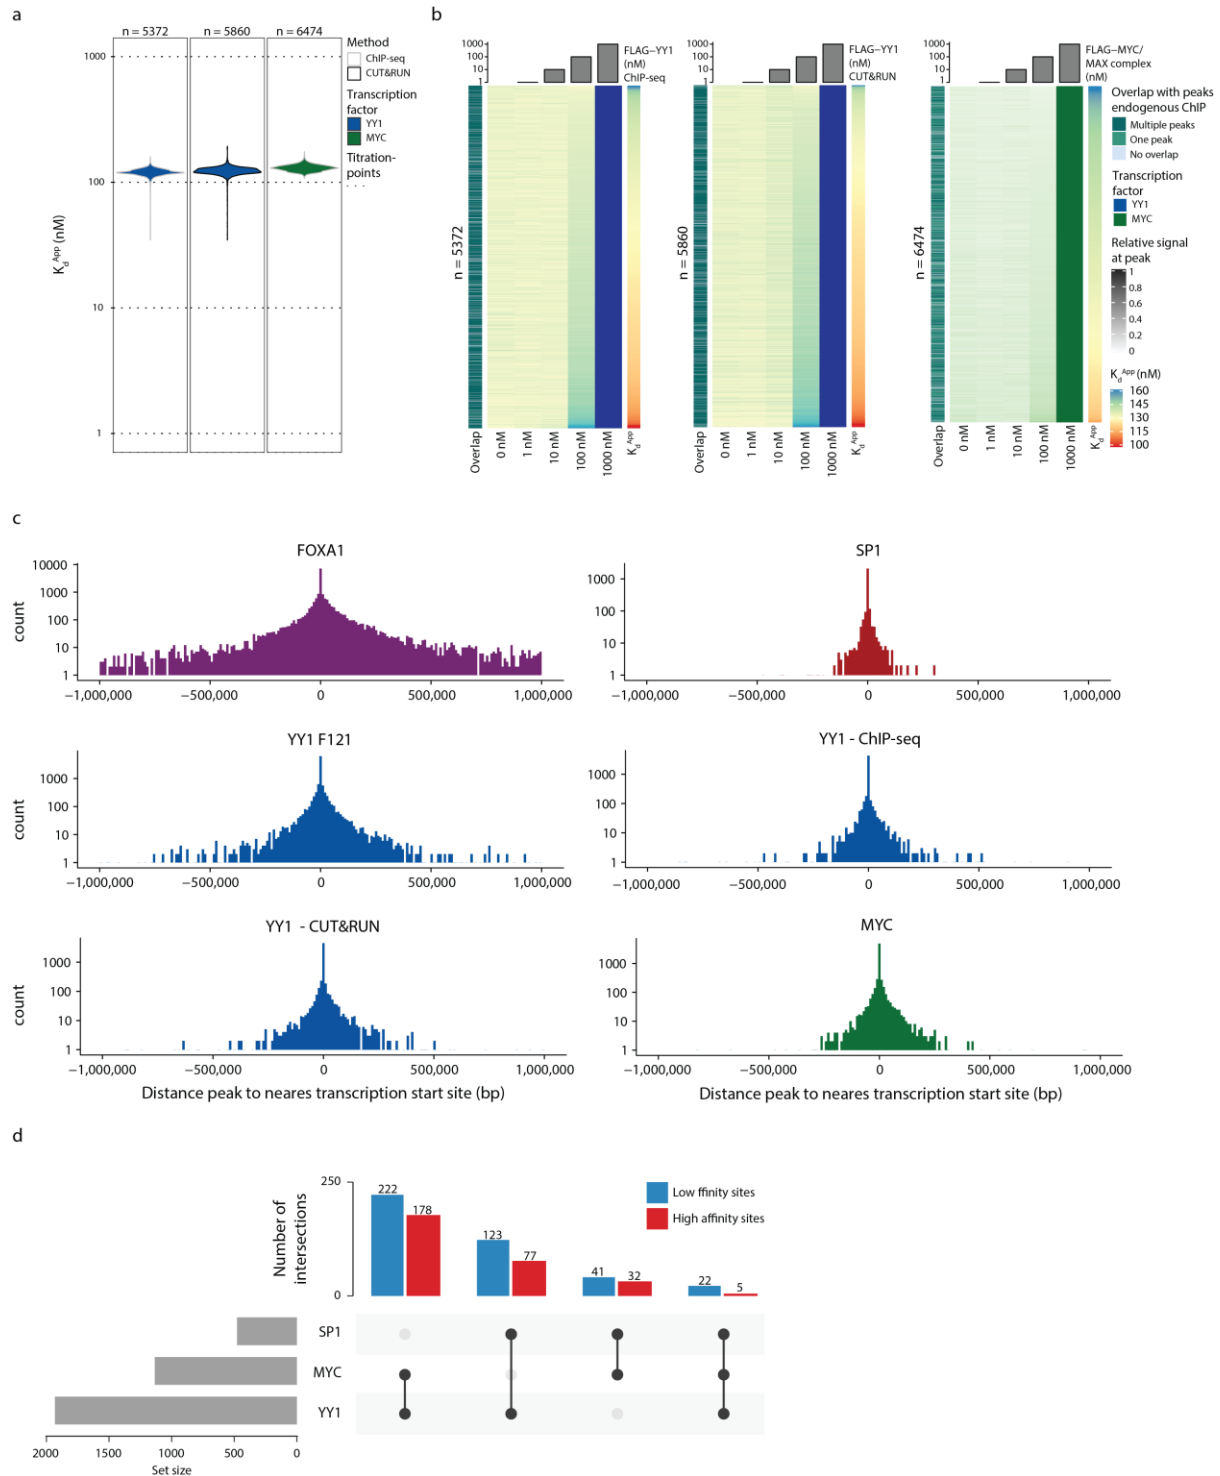

696

697

698

699

700

701

702

703

704

705

706

**Extended Data Figure 2 | Overview of results of additional BANC-seq experiments.** (a) Distribution of  $K_d^{App}$ s of c-MYC and YY1 in MCF-7 cells. YY1 apparent binding affinities were probed either by ChIP-seq or CUT&RUN-based follow up of the protocol. Dotted lines indicate the tested concentrations per experiment. (b) Heatmap representing spike-in normalised sequencing reads relative to the highest signal for the same experiments as in (a). Each row represents one transcription factor binding site. The overlap of each binding site with peaks from endogenous ChIP-seq experiments of the same transcription factor is shown to the left of each heatmap, while  $K_d^{App}$ s to the right. (c) Distance (bp) of identified transcription factor binding sites relative to the nearest transcription start site (TSS). (d) Blue and red barplot representing the overlap between promoters bound by YY1, MYC or SP1, separately for promoters assigned to be 20% highest or lowest affinity binding sites for all possible combinations of the three transcription factors. Grey barplot to the left representing the total size of each promoter set.

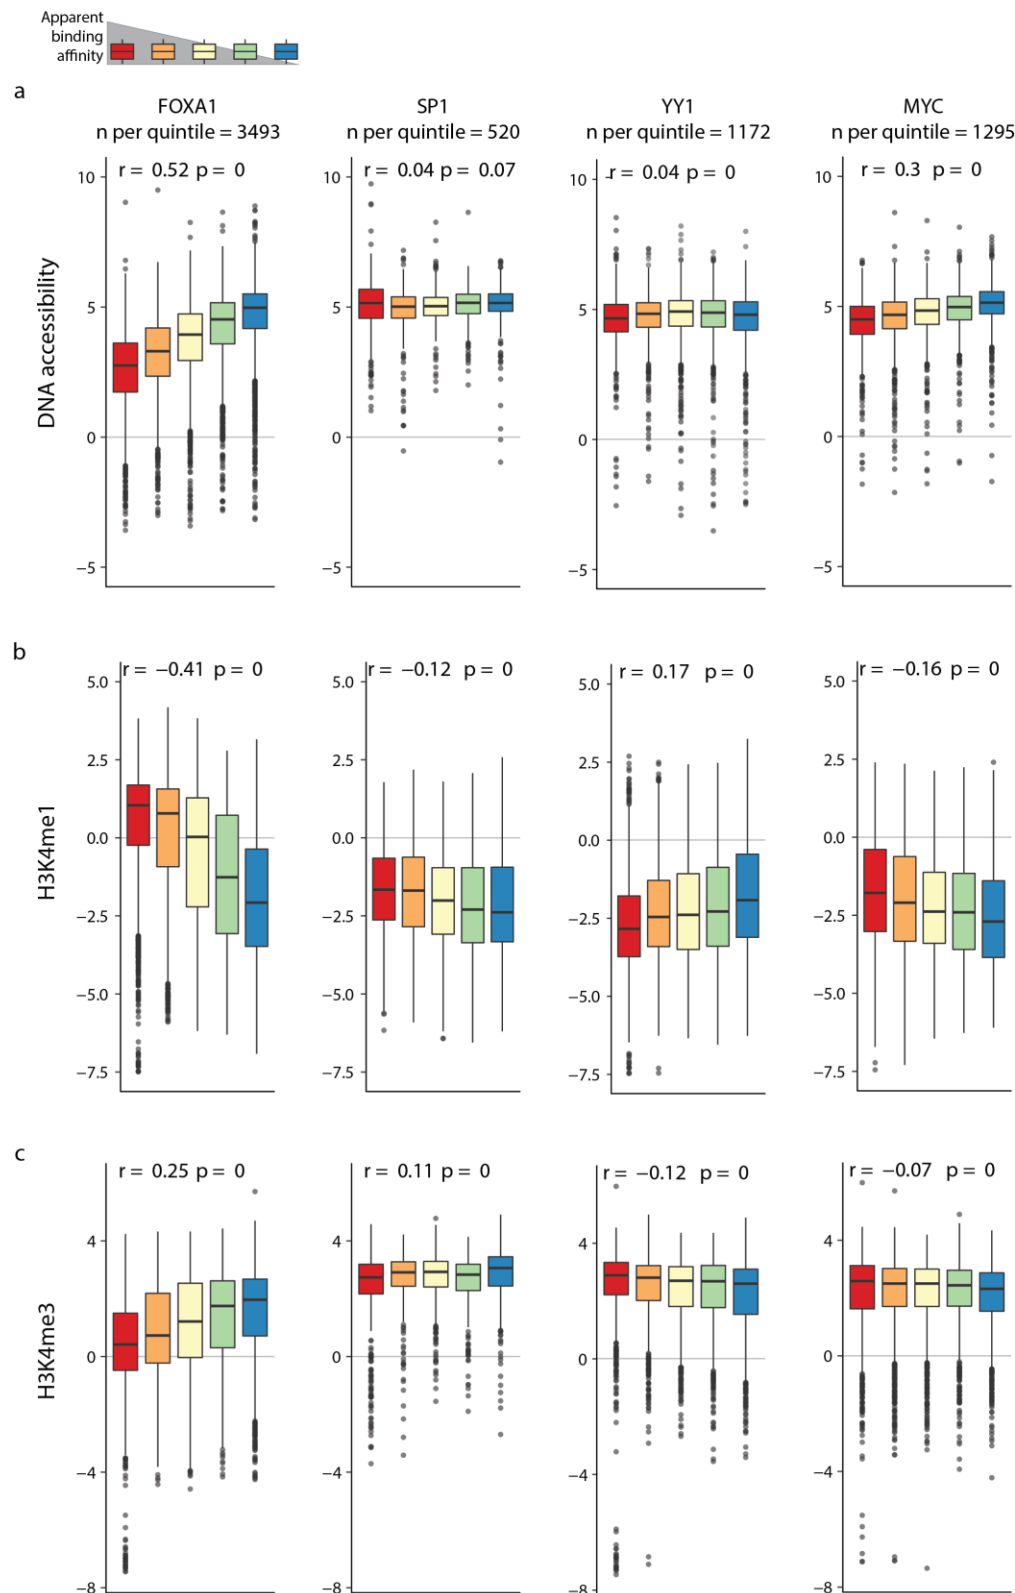

707

708 **Extended Data Figure 3 | Overview of the chromatin context and correlation with  $K_d^{APPS}$  for all transcription factors.**

709 Boxplots representing  $\log_2$  fold change of ATAC-seq (a), H3K4me1 ChIP-seq (b) or H3K4me3 ChIP-seq (c) signal over the mean

710 signal in matched control tracks for all tested transcription factors at sites with high confidence  $K_d^{APPS}$  fitted. Values are

711 ranked by  $K_d^{APPS}$  and divided into quintiles based on  $K_d^{APPS}$  per experiment. Rho ( $r$ ) and p-value from Spearman correlation

712 of the respective epigenome signal and  $K_d^{APPS}$  are included in the boxplots. Box plots were drawn with the center line as

713 the median, the hinges as the first and third quartiles, and with the whiskers extending to the lowest and highest values that

714 were within  $1.5 \times$  interquartile range..

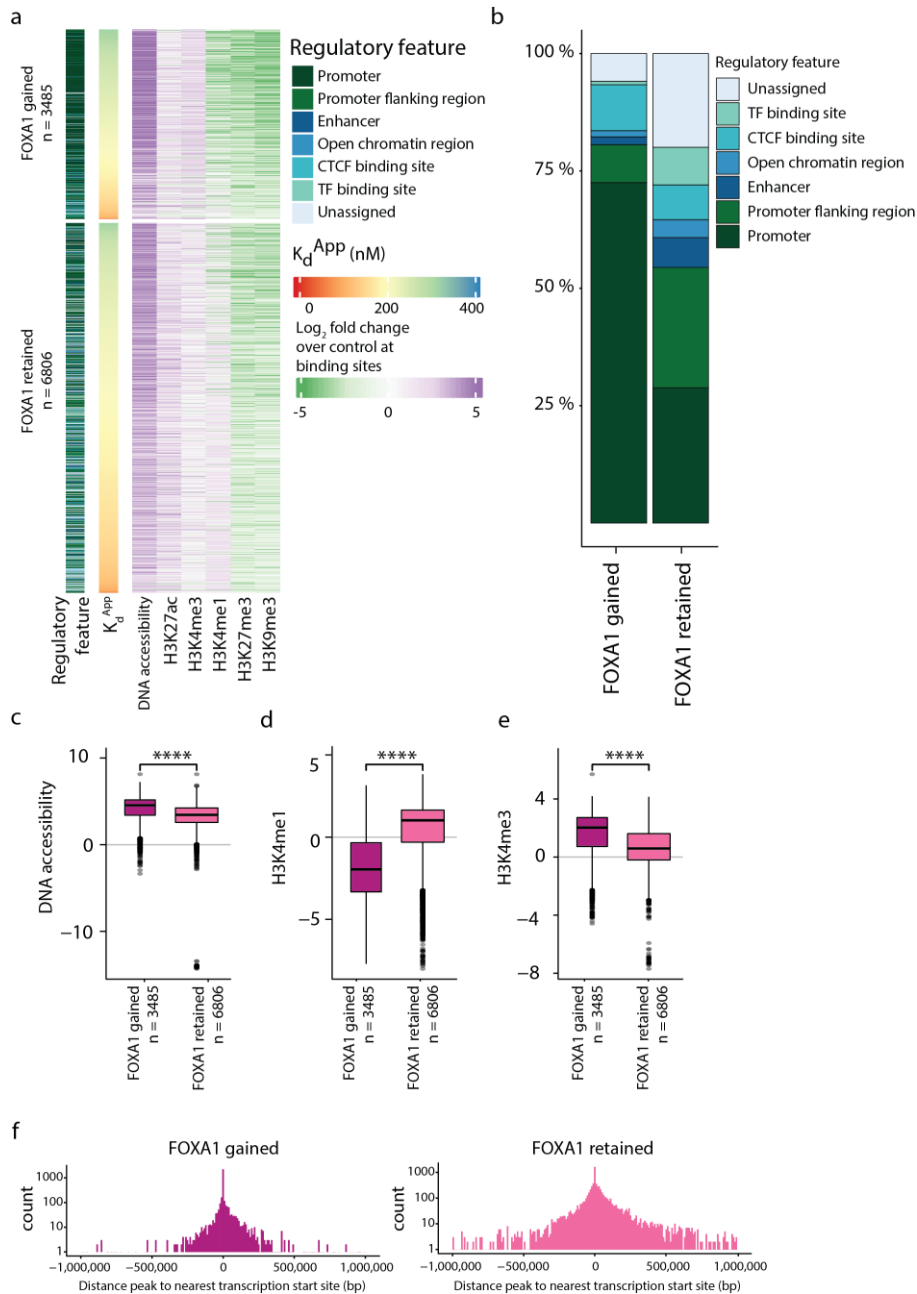

715  
716

717 **Extended Data Figure 4 | FOXA1 binds hyperaccessible promoters with low affinity upon overexpression in MCF-7.** (a)  
718 Heatmap showing the matched epigenome dynamics at sites with high-confidence  $K_d^{APP}$ s fitted for FOXA1 at either gained or  
719 retained sites after FOXA1 overexpression. Signal of ChIP-seq and ATAC-seq tracks for MCF-7 is shown as log<sub>2</sub> fold change  
720 over the mean signal in all matched control tracks, sites are ranked by apparent binding affinity (second column), and  
721 assigned regulatory features are depicted in the first column. (b) Overlap of gained or retained FOXA1 binding sites with  
722 known regulatory features. (c - e) log<sub>2</sub> fold change of ATAC-seq, H3K4me1 ChIP-seq or H3K4me3 ChIP-seq signal over the  
723 mean signal in matched control tracks, separated by sites being gained and retained sites after FOXA1 overexpression. \* are  
724 used to indicate significance according to a two-sided Wilcoxon test (\*\*\*\*:  $p \leq 0.0001$ ). (f) Distance (bp) of gained or  
725 retained sites to the nearest transcription start site (TSS). Box plots were drawn with the center line as the median, the hinges  
726 as the first and third quartiles, and with the whiskers extending to the lowest and highest values that were within 1.5 ×  
727 interquartile range.  
728



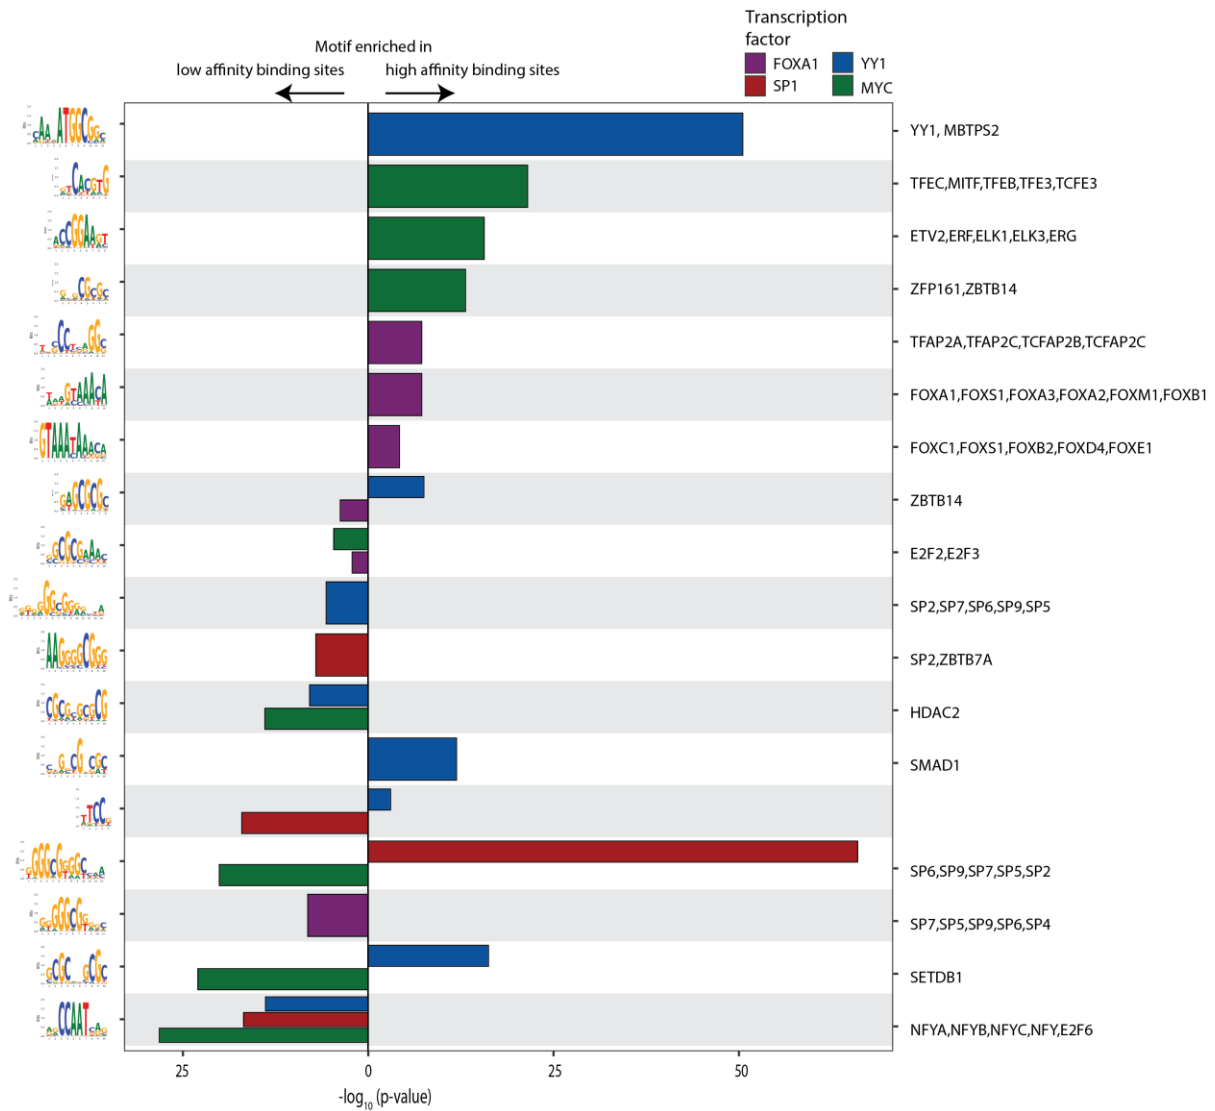

729

730 **Extended Data Figure 5 | Transcription factor specific motifs versus generic motifs in high versus low affinity binding sites.**

731 Bar plot representing p-values (-log<sub>10</sub>) of top motifs per transcription factor for either high or low affinity binding sites. Motif

732 logos on the left of the plot, names of associated transcription factors (if known) to the right..

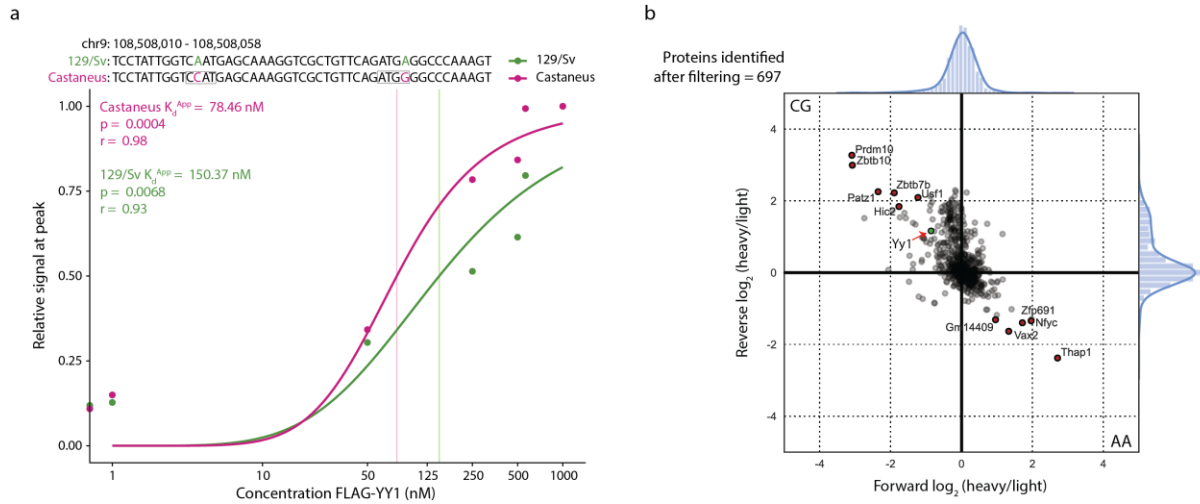

733  
 734  
 735  
 736  
 737  
 738

**Extended Data Figure 6 | Minor sequence variations in and near the consensus motif of YY1 fine-tune apparent binding affinities.** (a) Spike-in normalised sequencing reads per allele and titration point of FLAG-YY1 in F121 mESCs relative to the highest signal at the *Qars* promoter. (b) Binding ratios ( $\log_2$  scale) of proteins identified by DNA-pull-down followed by mass spec with oligos identical to the sequences in (a) Red arrow indicates Yy1.
